# Supplementary material for: Spatial distribution and interannual variation of surface PM 10 concentrations over eighty-six Chinese cities
Source: Copernicus journal article supplement (doi:10.5194/acp-10-5641-2010), 2010-06-29

# Monthly mean tropospheric NO<sub>2</sub> over Southeast Asia from OMI version 1.0 (2004.10-2007.2)

Monthly mean tropospheric NO<sub>2</sub> over Southeast Asia during October 2004 to February 2007 extracted from OMI (the Ozone Monitoring Instrument) version 1.0 (website, [http://www.temis.nl/airpollution/no2col/no2regioomimonth\\_col3.php](http://www.temis.nl/airpollution/no2col/no2regioomimonth_col3.php)) (Boersma, et al., 2007).

Boersma, K. F., Eskes, H. J., Veefkind, J. P., Brinksma, E. J., van der A, R. J., Sneep, M., van den Oord, G. H. J., Levelt, P. F., Stammes, P., Gleason J. F., and Bucsela, E. J.: Near-real time retrieval of tropospheric NO<sub>2</sub> from OMI, *Atm. Chem. Phys.*, 7, 2013-2128, 2007, [http:// www.atmos-chem-phys.net/7/2103/2007/](http://www.atmos-chem-phys.net/7/2103/2007/).

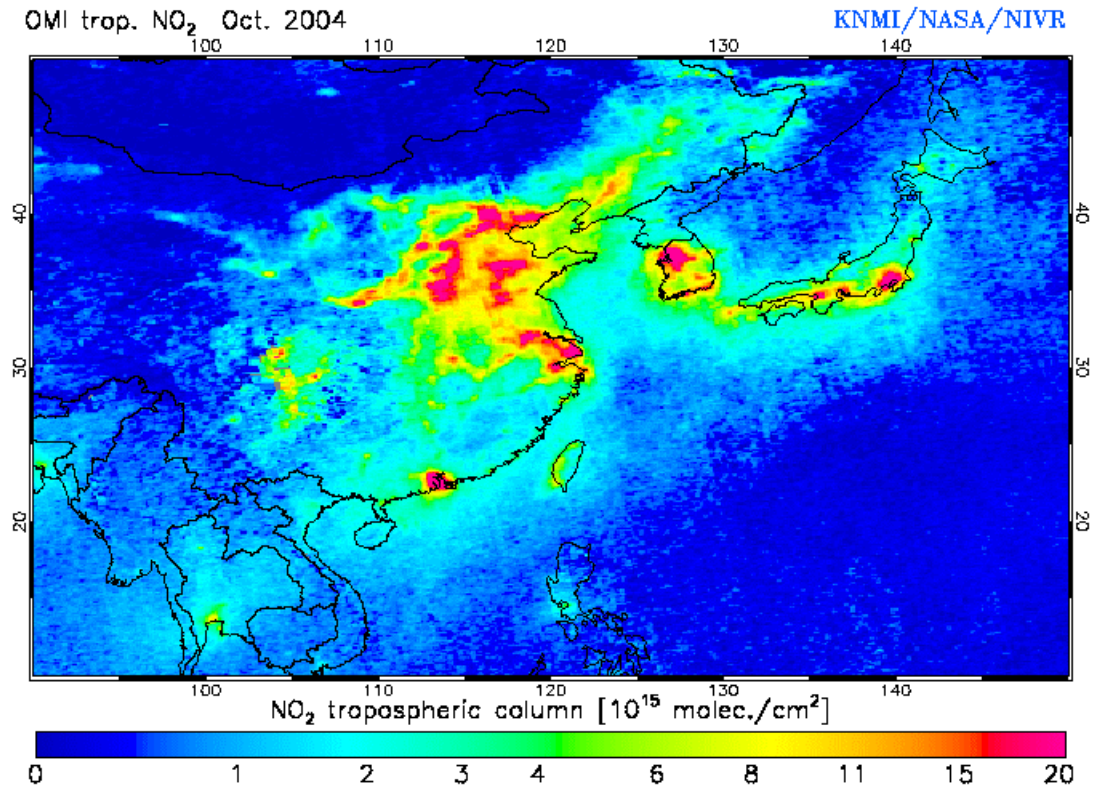

OMI trop. NO<sub>2</sub> Nov. 2004

KNMI/NASA/NIVR

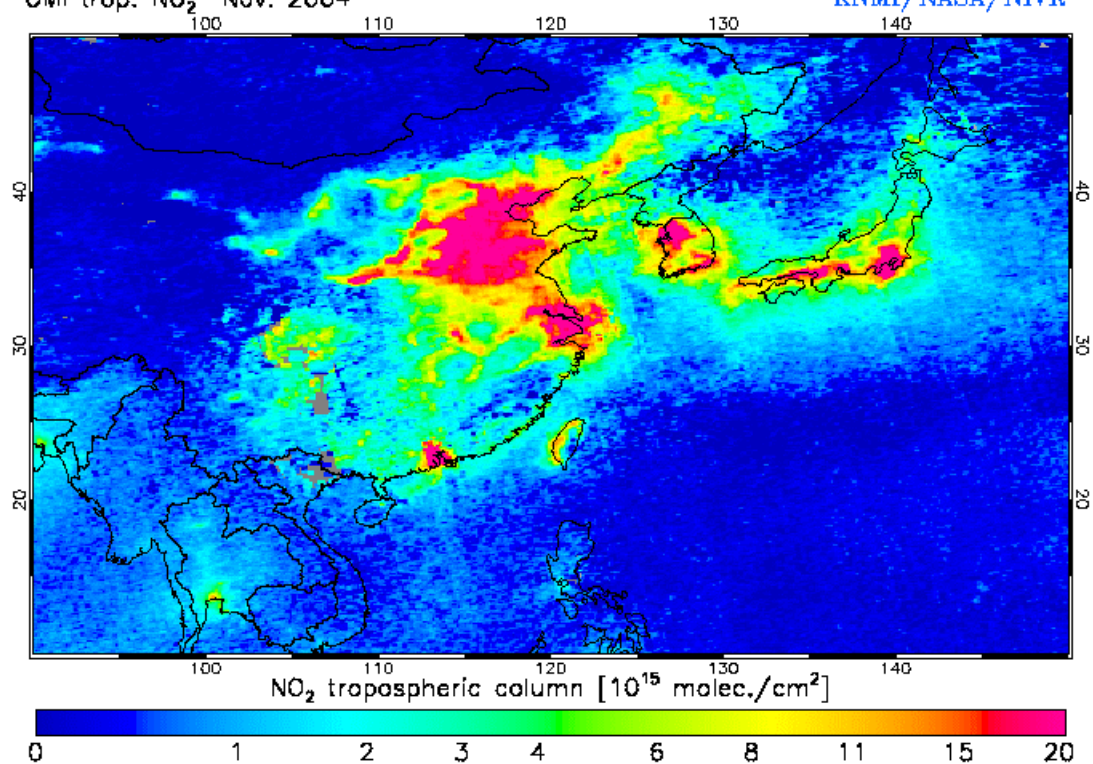

OMI trop. NO<sub>2</sub> Dec. 2004

KNMI/NASA/NIVR

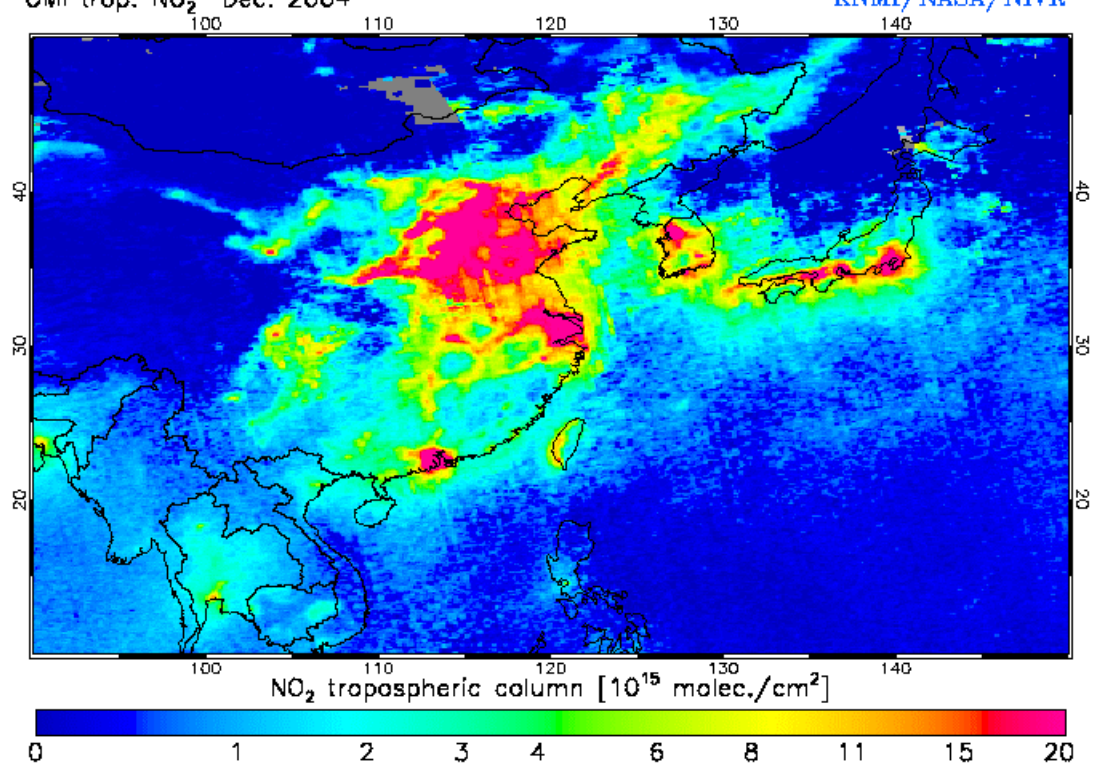

OMI trop. NO<sub>2</sub> Jan. 2005

KNMI/NASA/NIVR

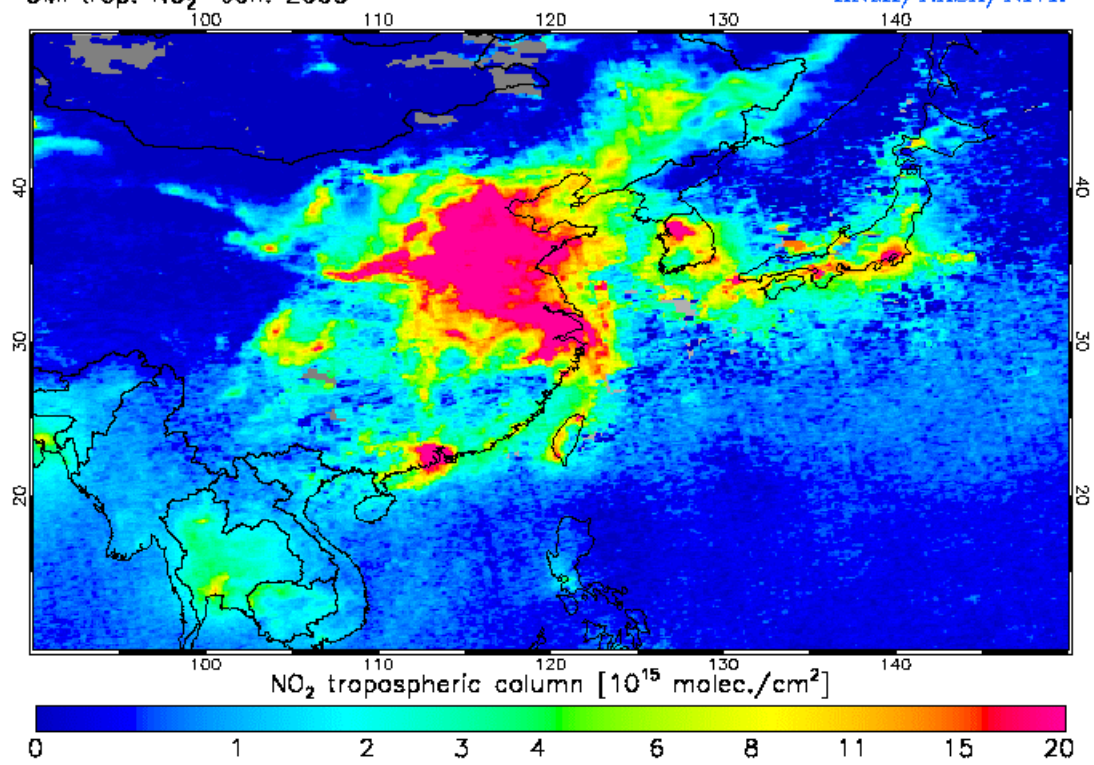

OMI trop. NO<sub>2</sub> Feb. 2005

KNMI/NASA/NIVR

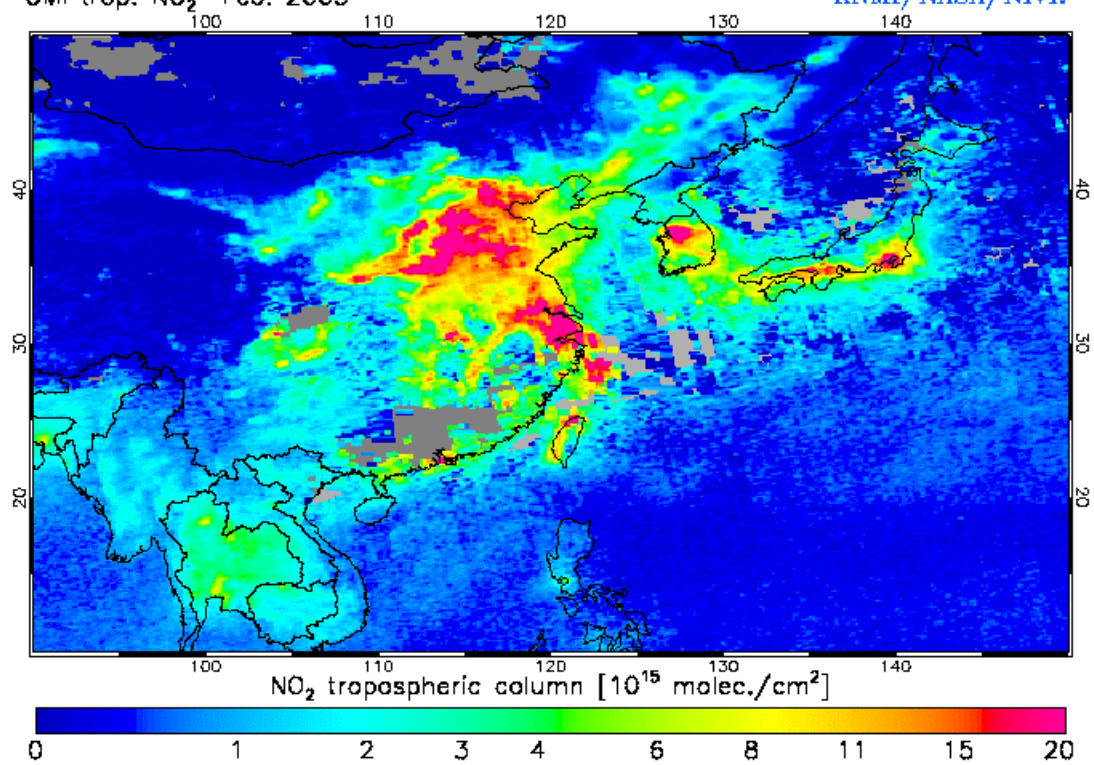



OMI trop. NO<sub>2</sub> Mar. 2005

KNMI/NASA/NIVR

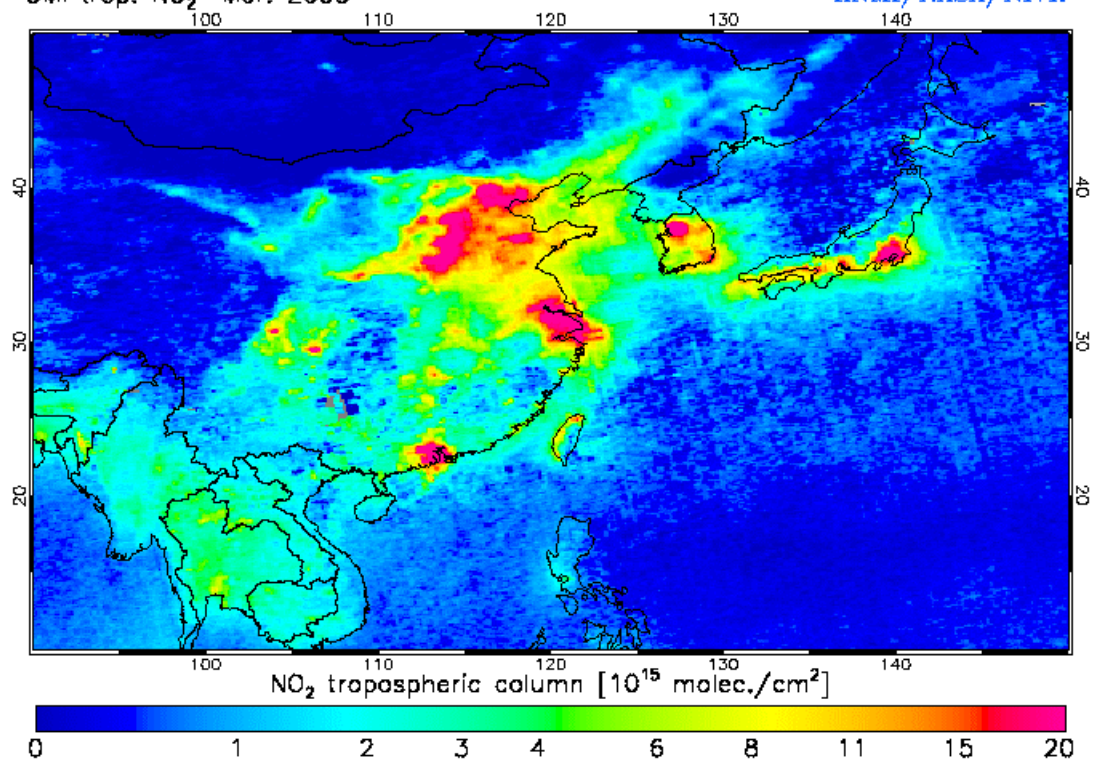

OMI trop. NO<sub>2</sub> Apr. 2005

KNMI/NASA/NIVR

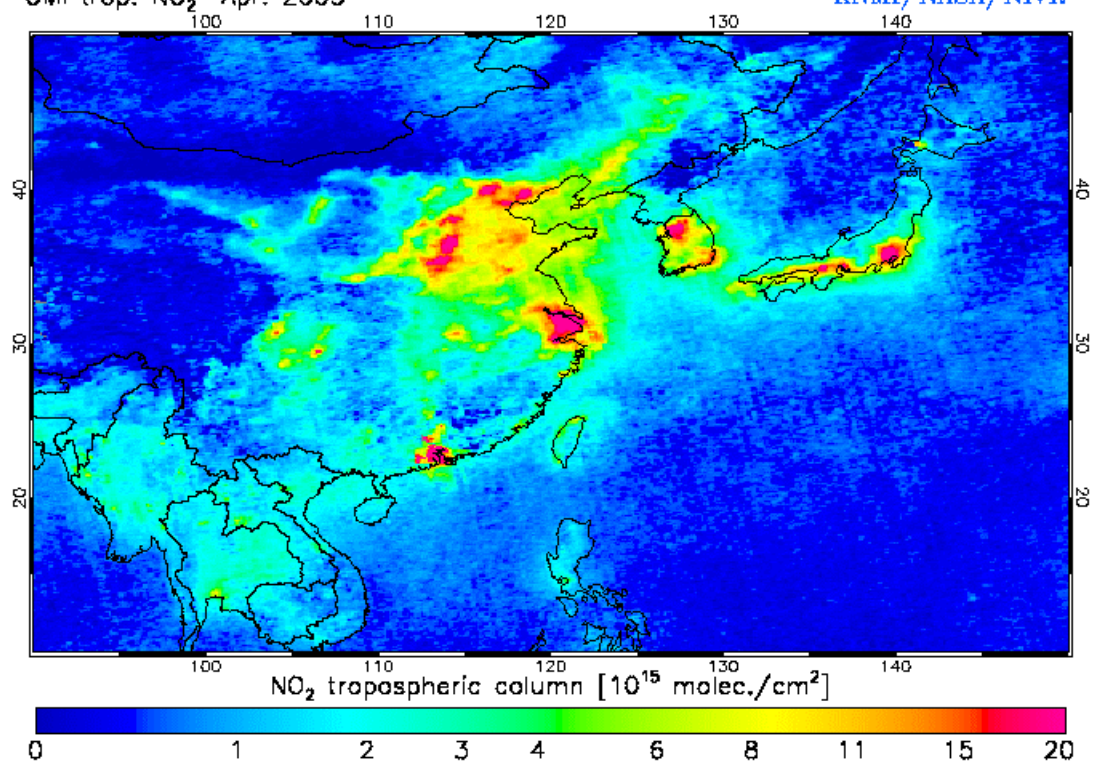

OMI trop. NO<sub>2</sub> May 2005

KNMI/NASA/NIVR

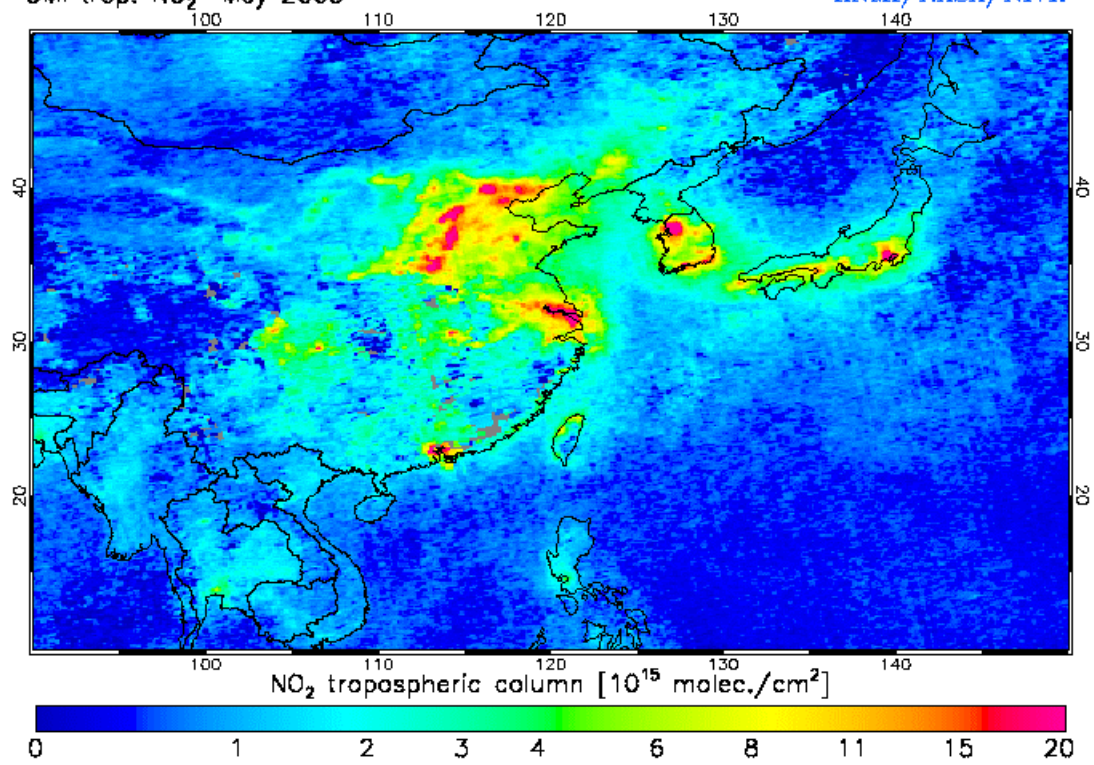

OMI trop. NO<sub>2</sub> June 2005

KNMI/NASA/NIVR

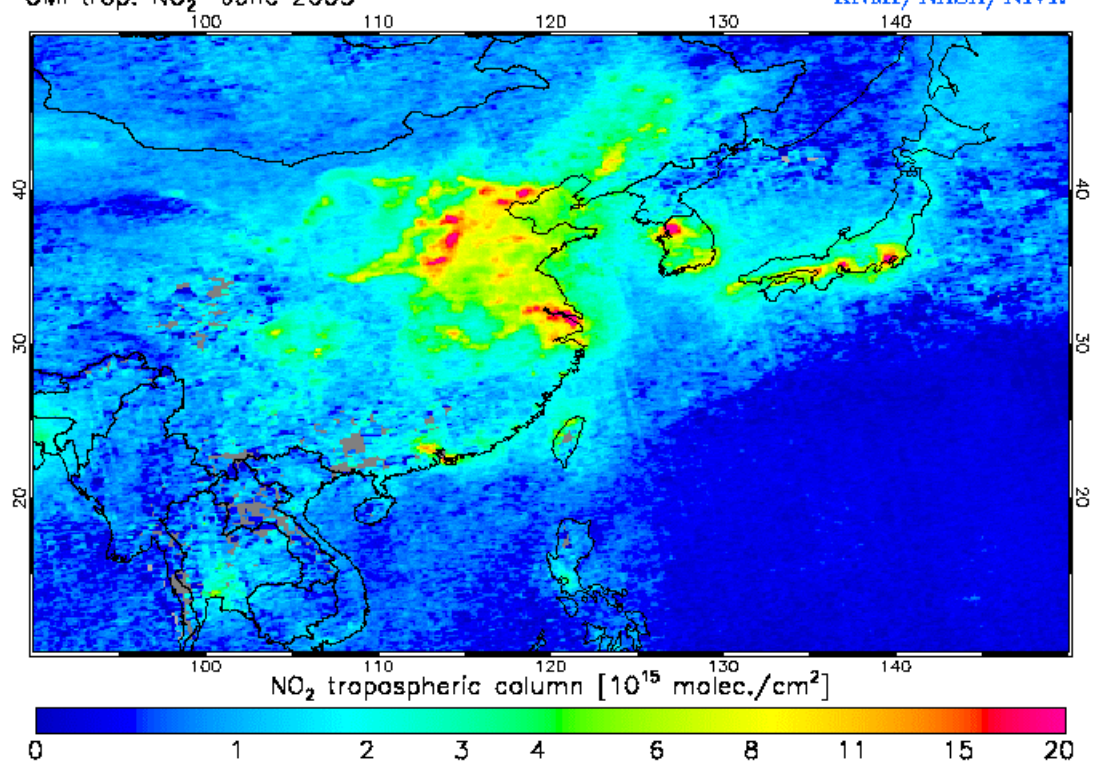



OMI trop. NO<sub>2</sub> July 2005

KNMI/NASA/NIVR

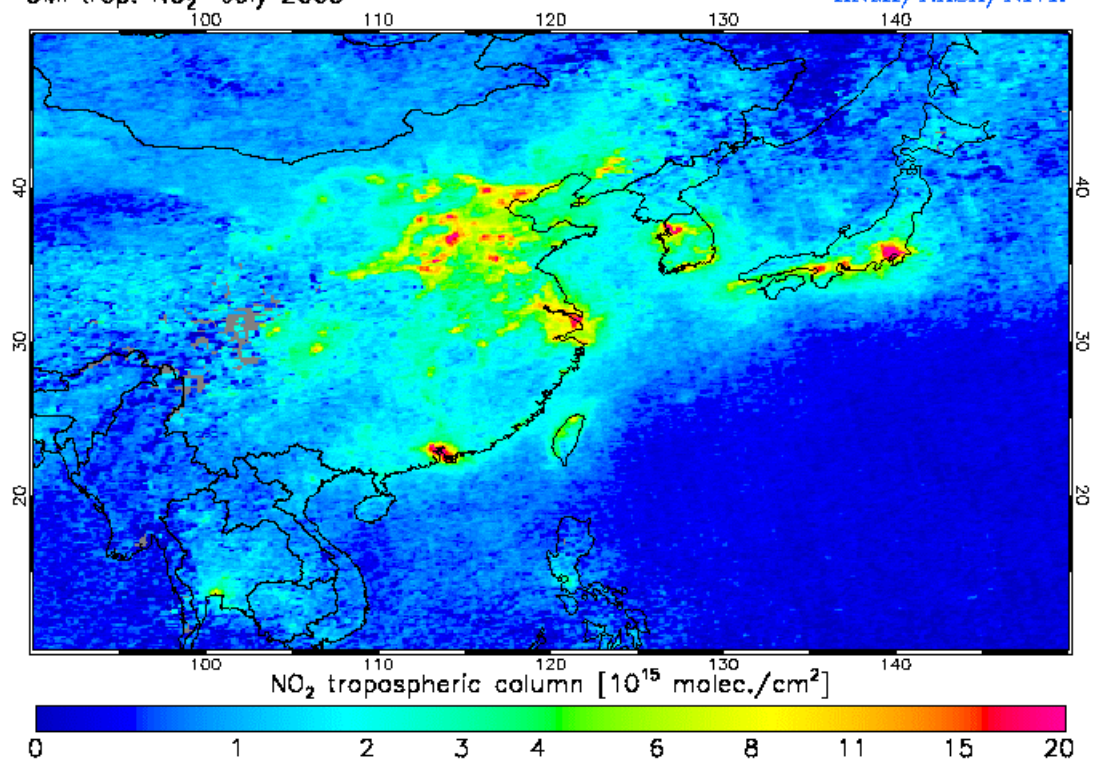

OMI trop. NO<sub>2</sub> Aug. 2005

KNMI/NASA/NIVR

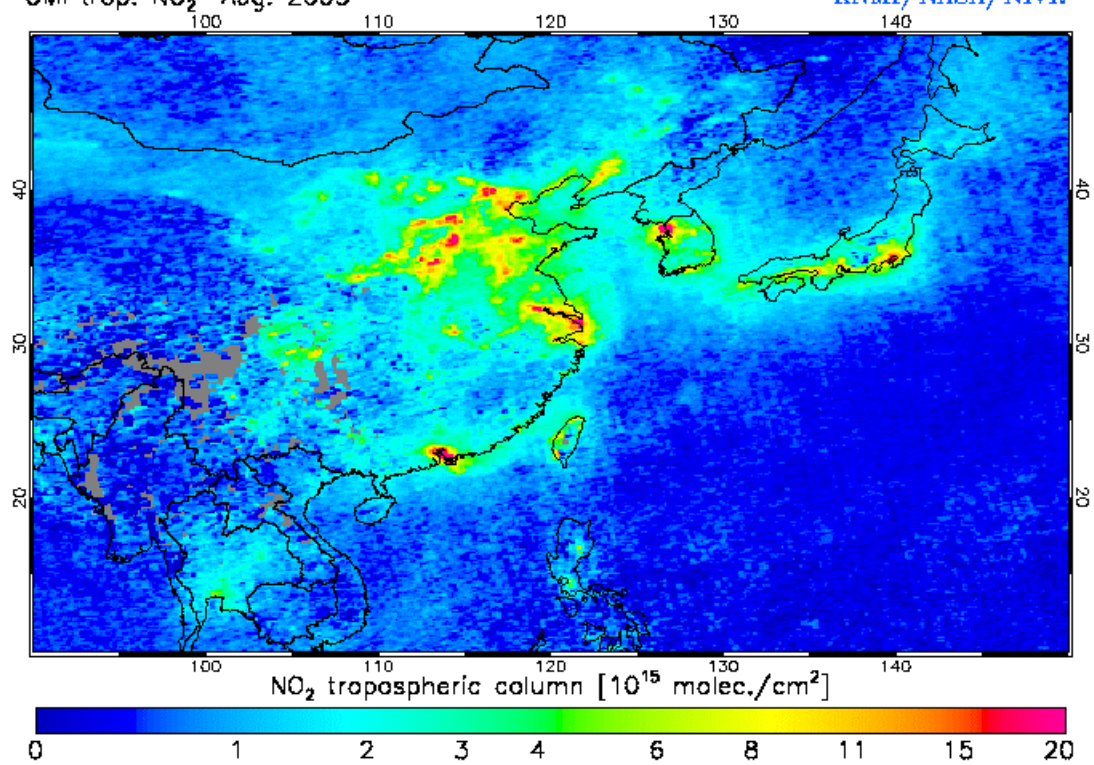

OMI trop. NO<sub>2</sub> Sep. 2005

KNMI/NASA/NIVR

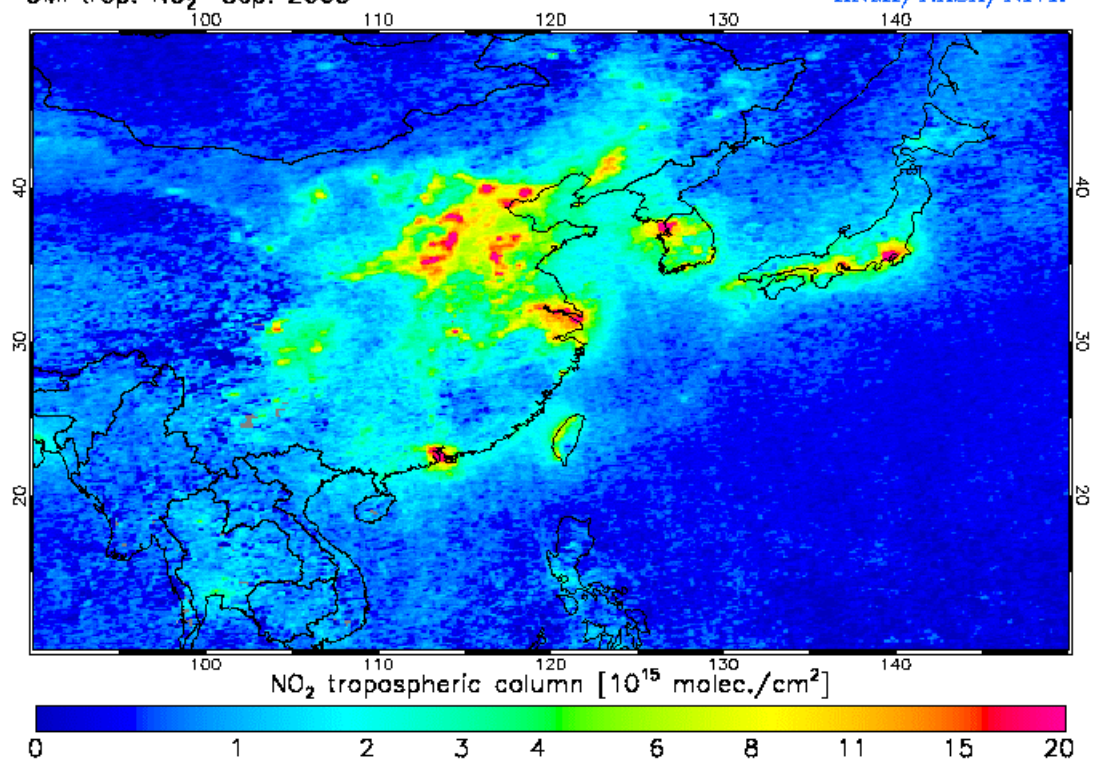

OMI trop. NO<sub>2</sub> Oct. 2005

KNMI/NASA/NIVR

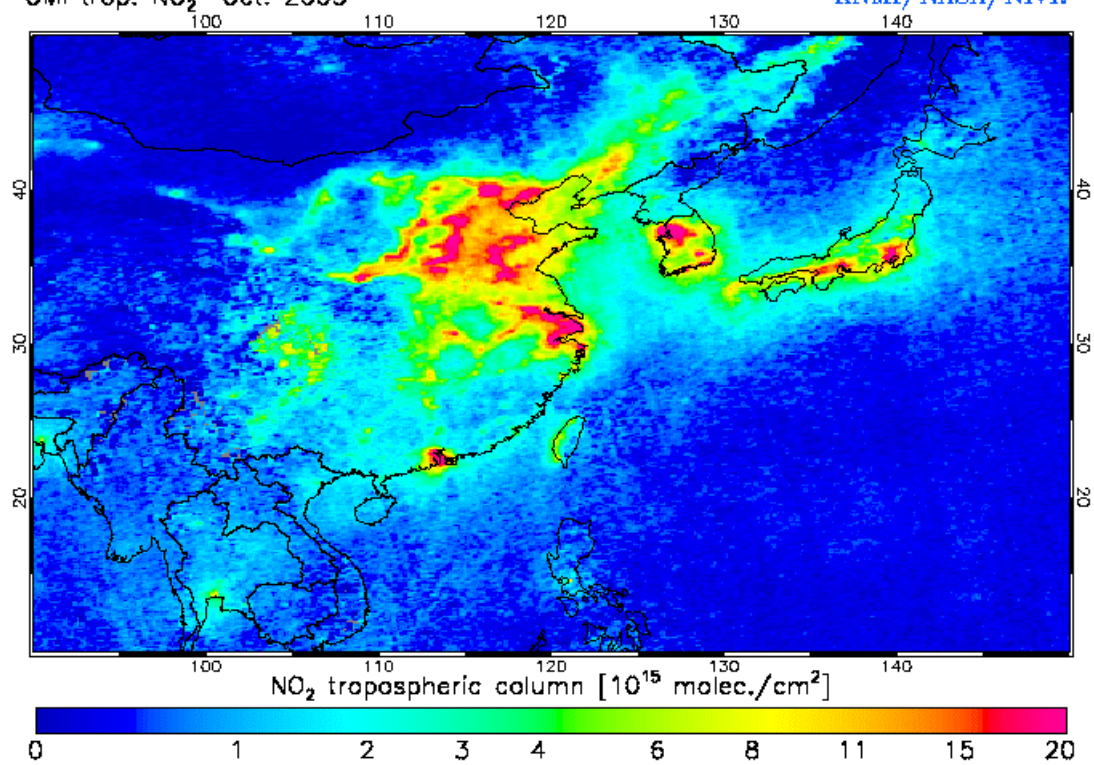



OMI trop. NO<sub>2</sub> Nov. 2005

KNMI/NASA/NIVR

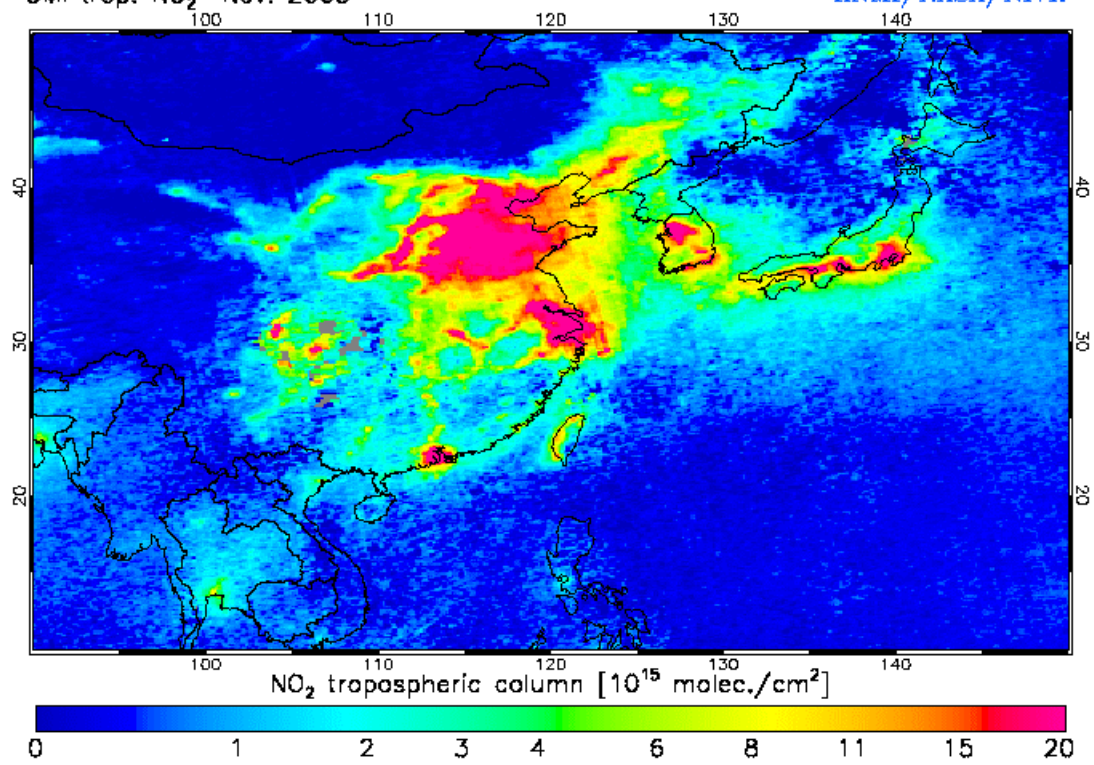

OMI trop. NO<sub>2</sub> Dec. 2005

KNMI/NASA/NIVR

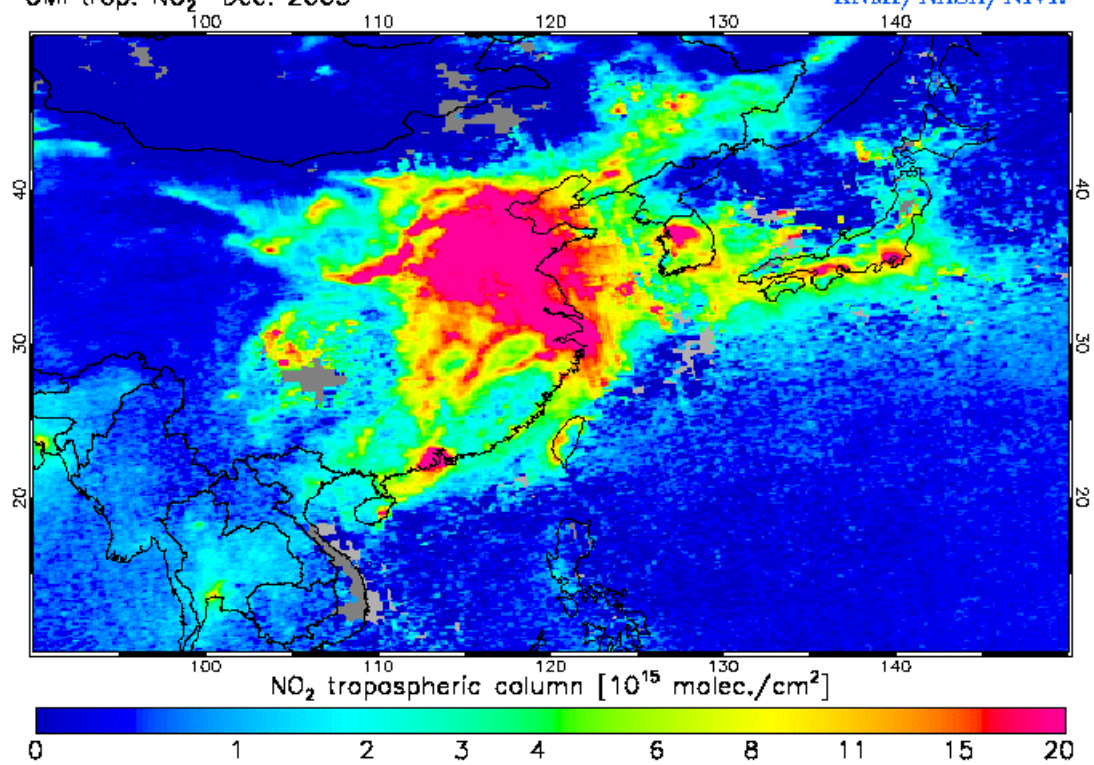



OMI trop. NO<sub>2</sub> Jan. 2006

KNMI/NASA/NIVR

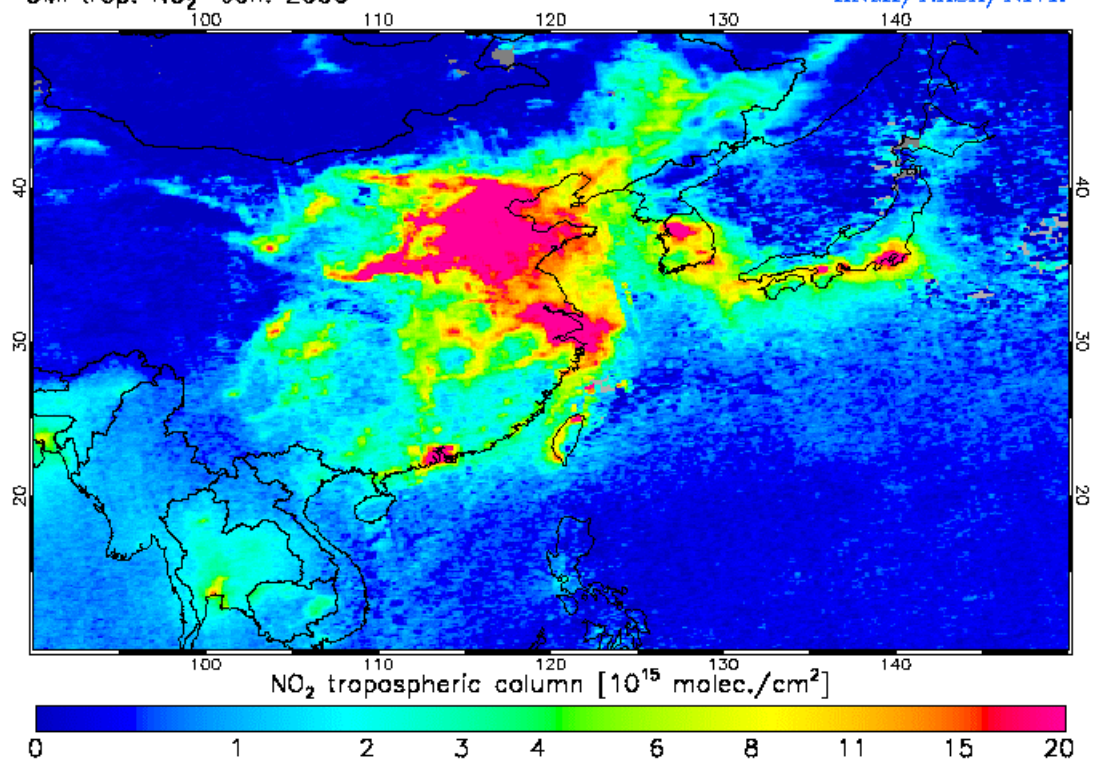

OMI trop. NO<sub>2</sub> Feb. 2006

KNMI/NASA/NIVR

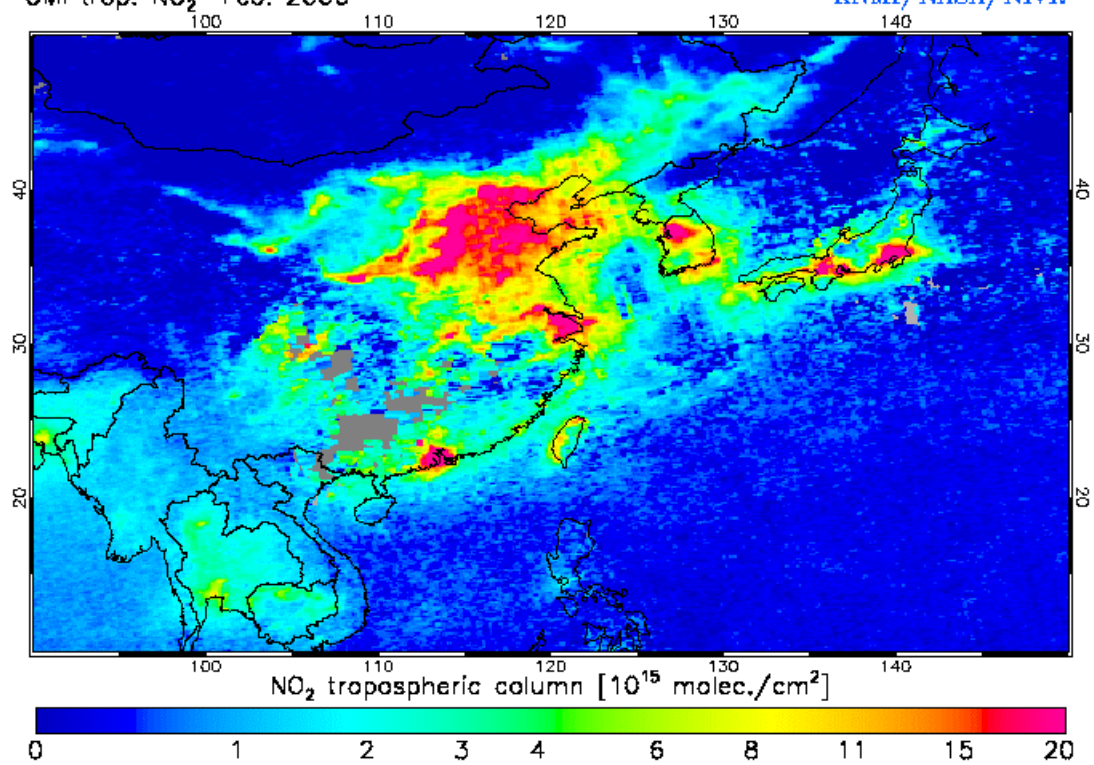

OMI trop. NO<sub>2</sub> Mar. 2006

KNMI/NASA/NIVR

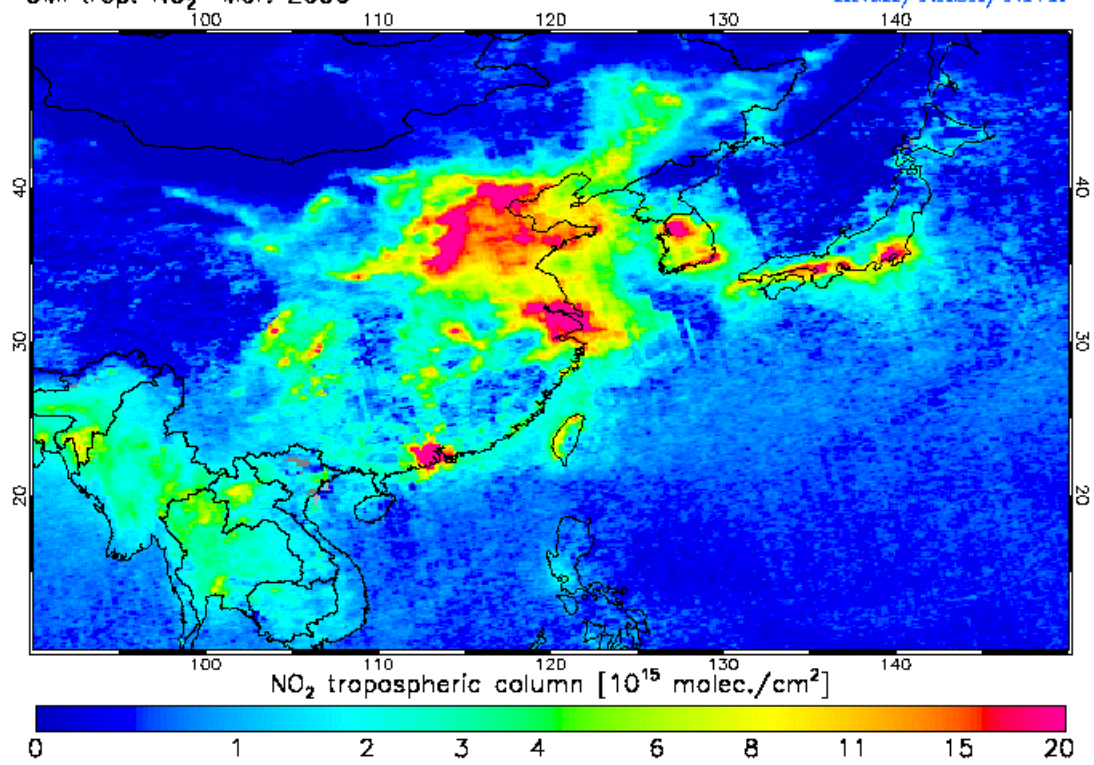

OMI trop. NO<sub>2</sub> Apr. 2006

KNMI/NASA/NIVR

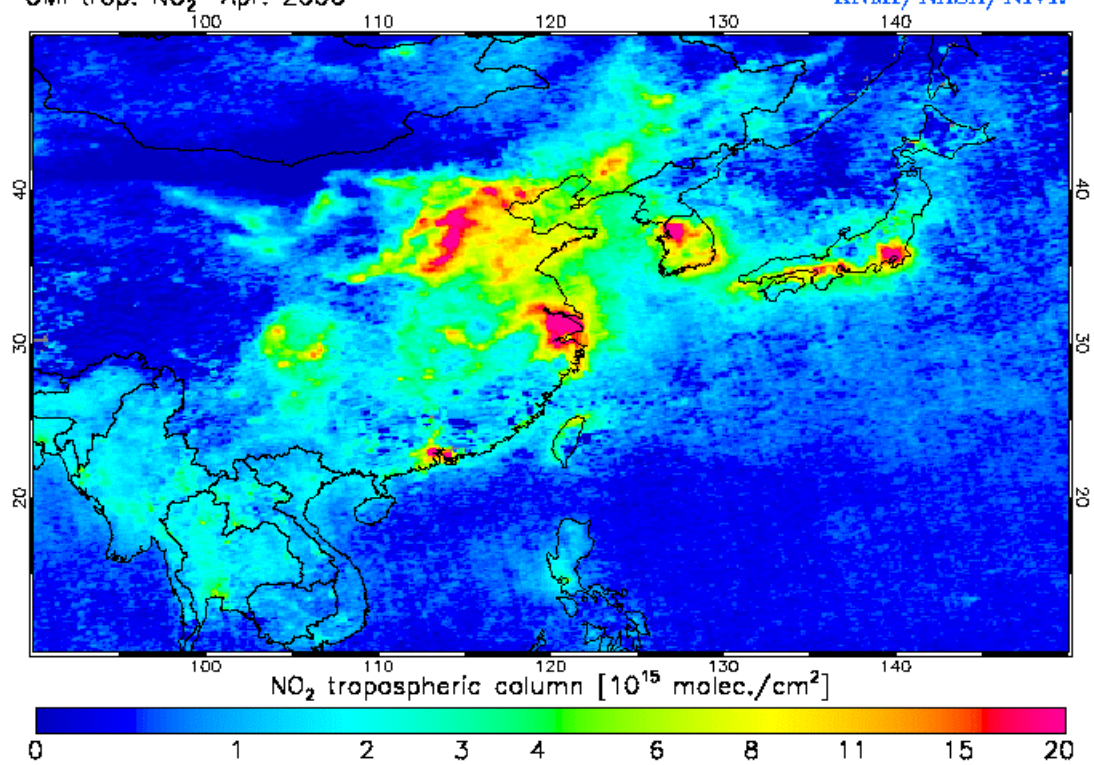



OMI trop. NO<sub>2</sub> May 2006

KNMI/NASA/NIVR

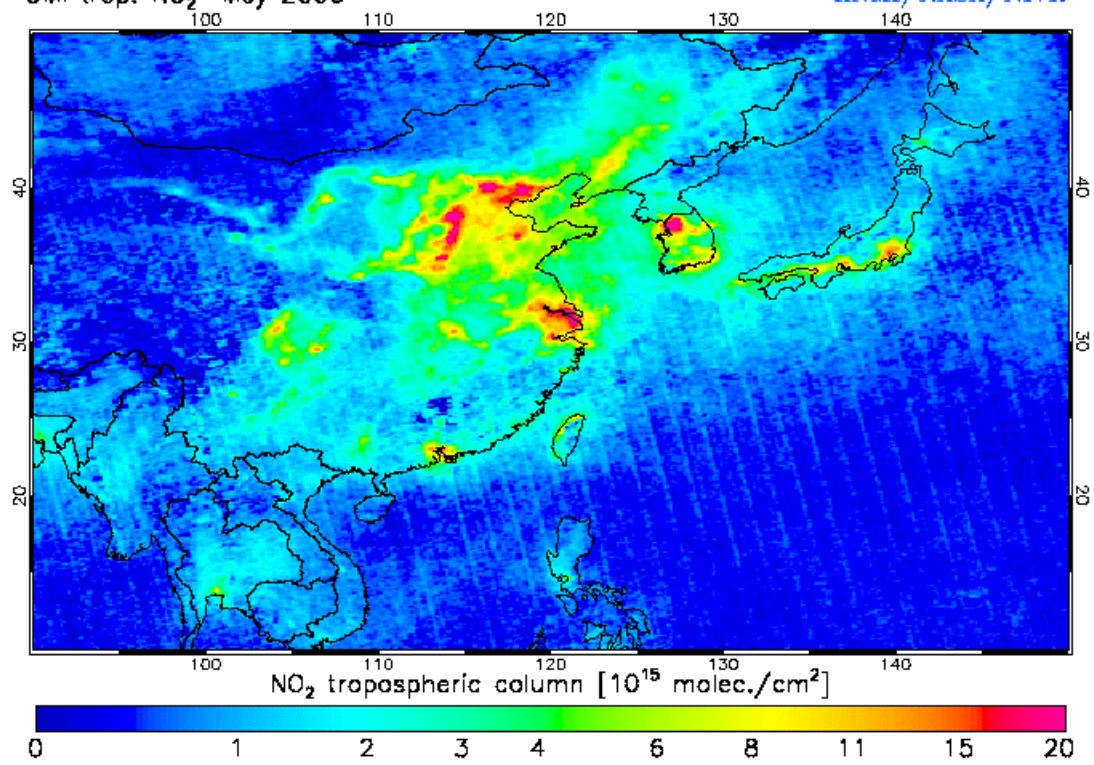

OMI trop. NO<sub>2</sub> June 2006

KNMI/NASA/NIVR

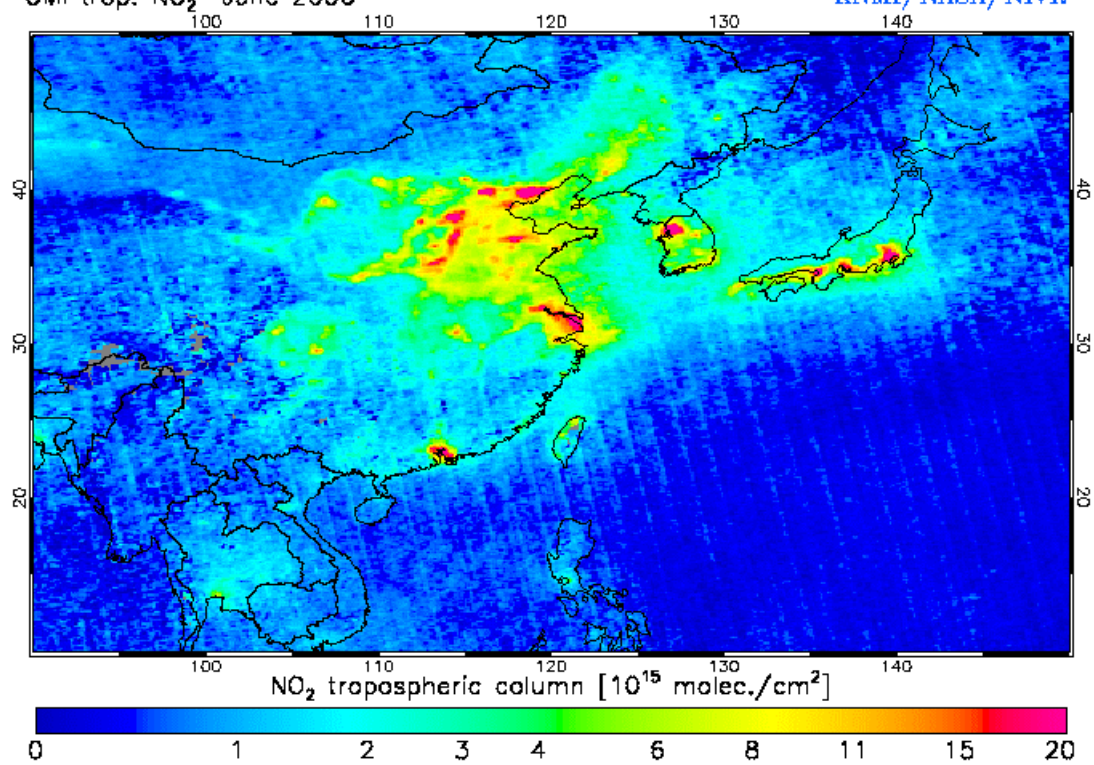

OMI trop. NO<sub>2</sub> July 2006

KNMI/NASA/NIVR

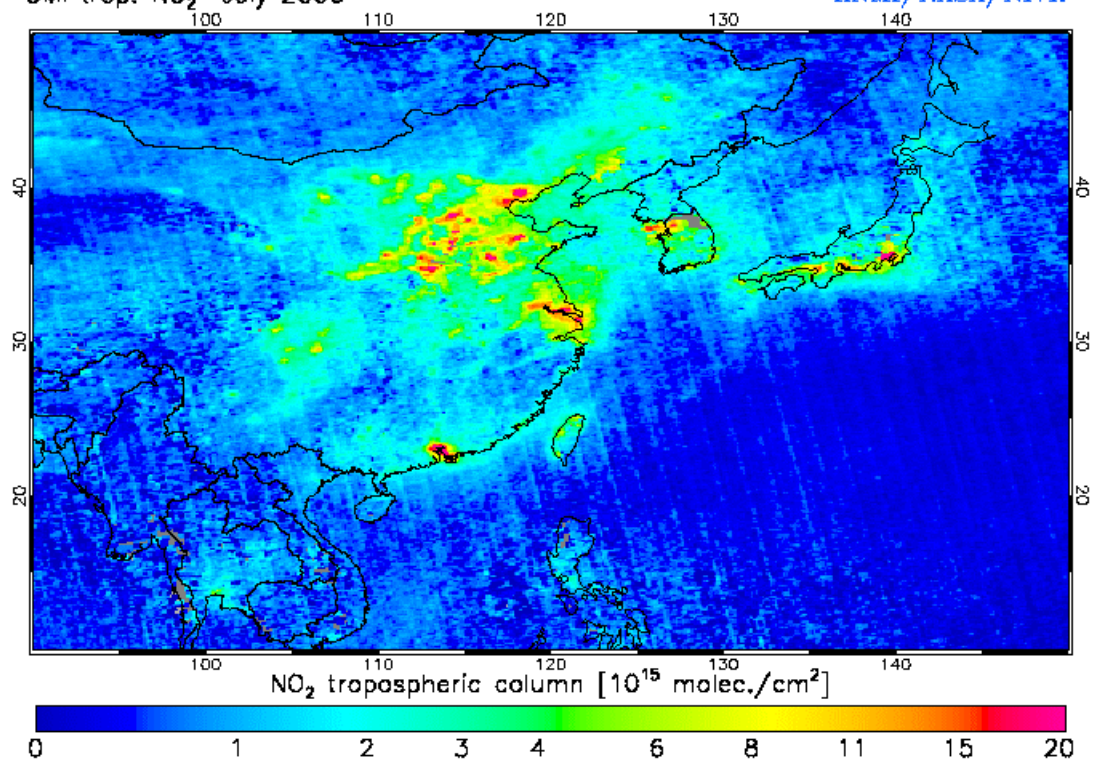

OMI trop. NO<sub>2</sub> Aug. 2006

KNMI/NASA/NIVR

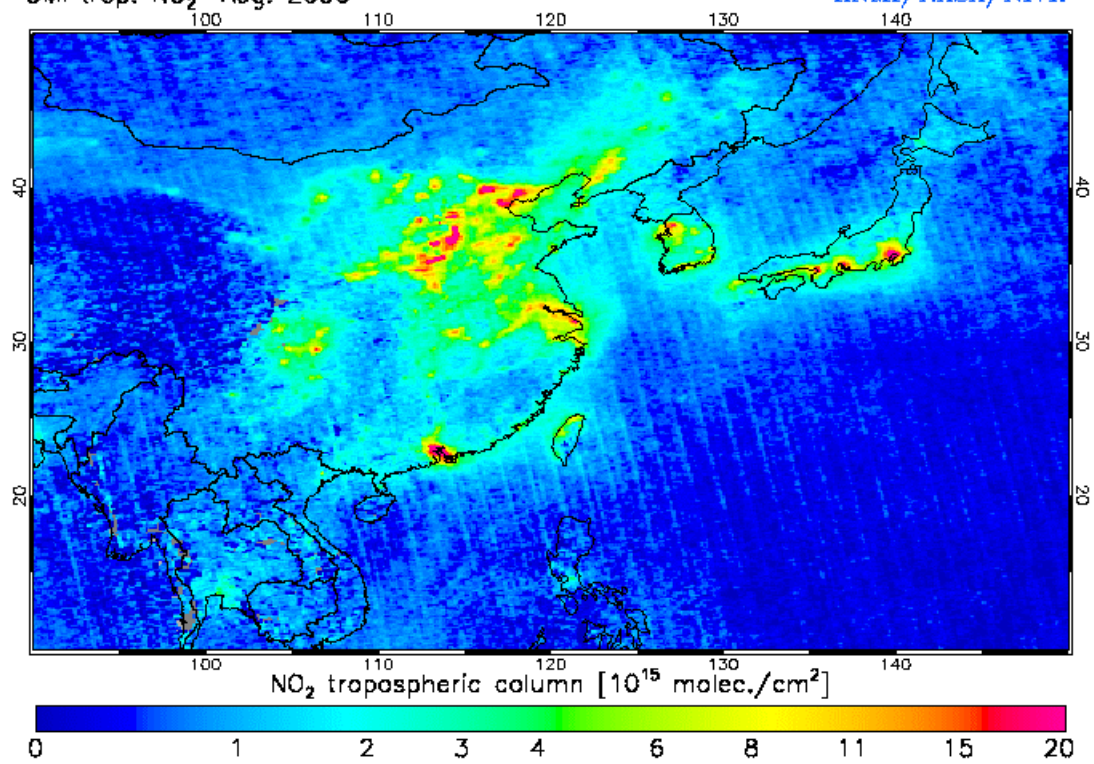



OMI trop. NO<sub>2</sub> Sep. 2006

KNMI/NASA/NIVR

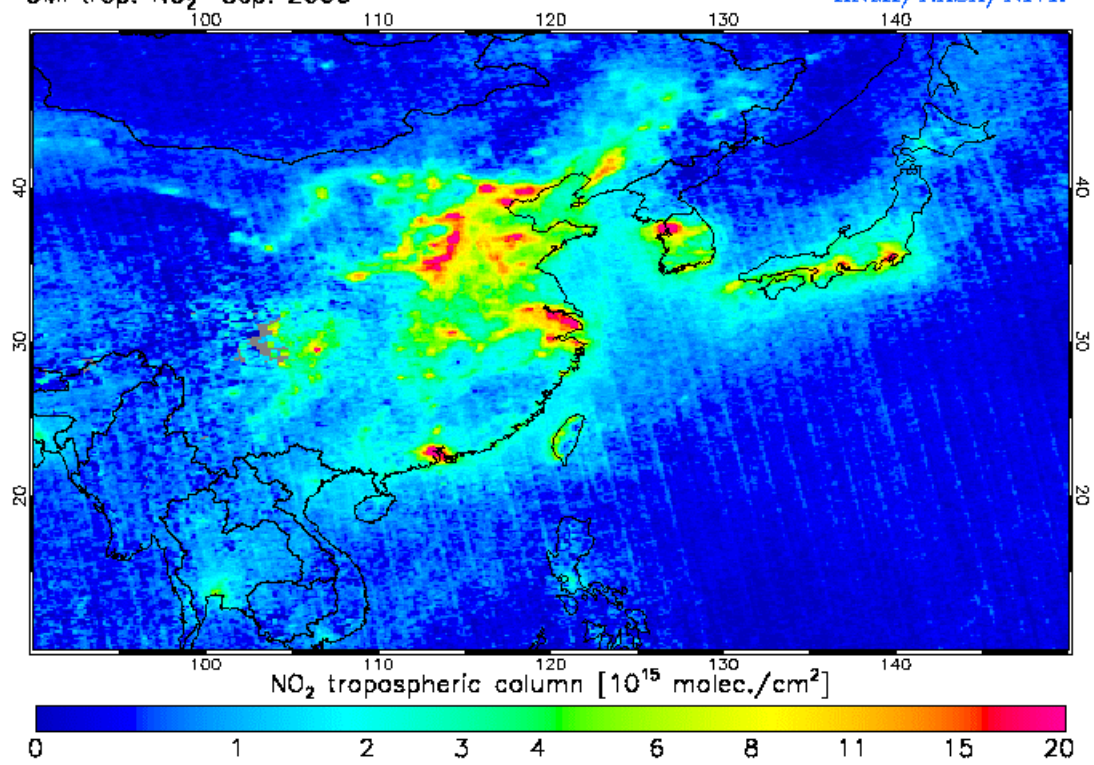

OMI trop. NO<sub>2</sub> Oct. 2006

KNMI/NASA/NIVR

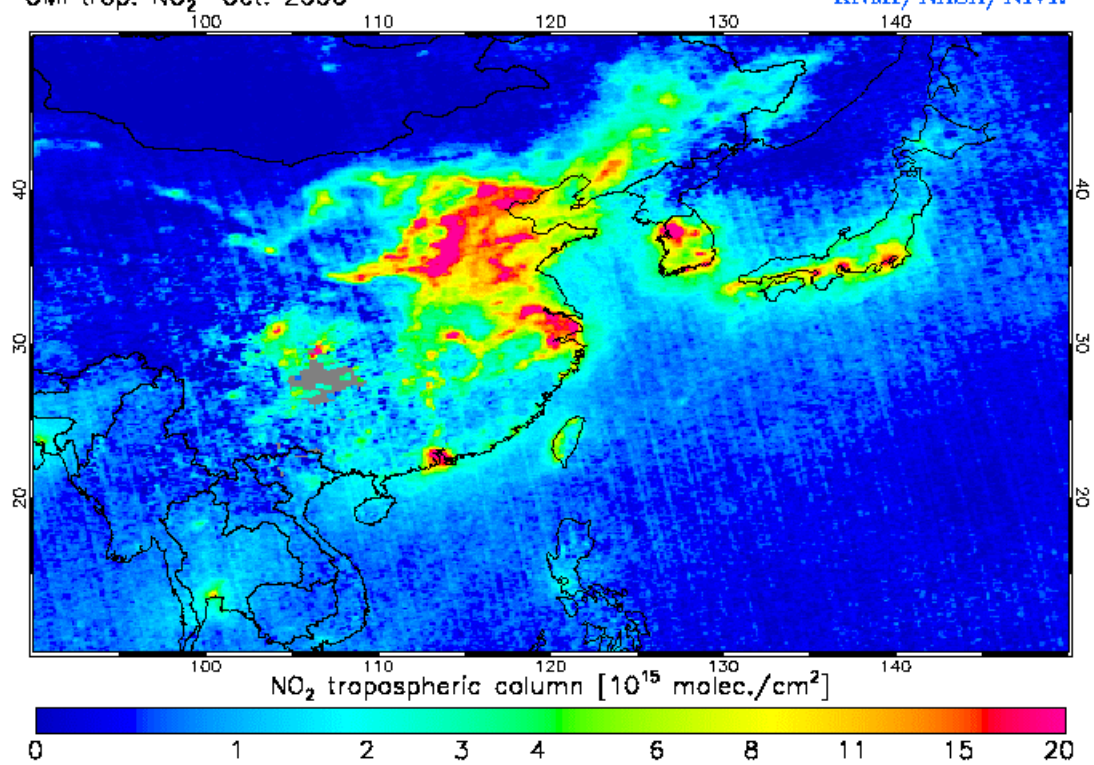

OMI trop. NO<sub>2</sub> Nov. 2006

KNMI/NASA/NIVR

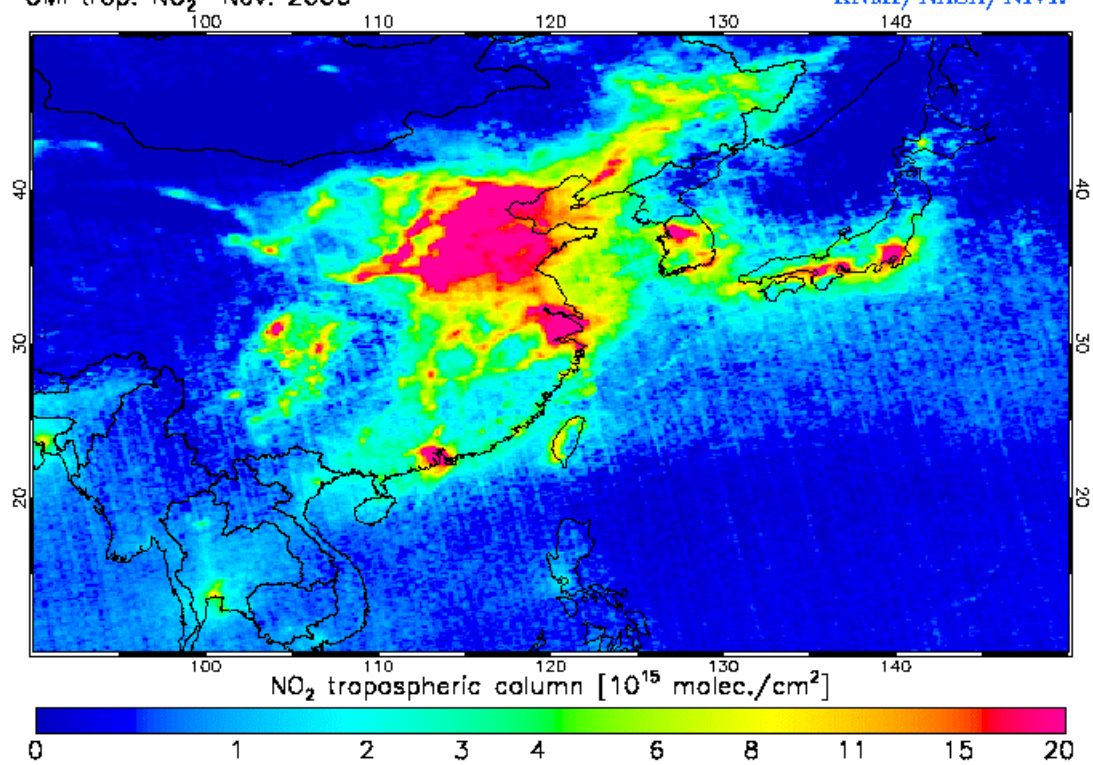

OMI trop. NO<sub>2</sub> Dec. 2006

KNMI/NASA/NIVR

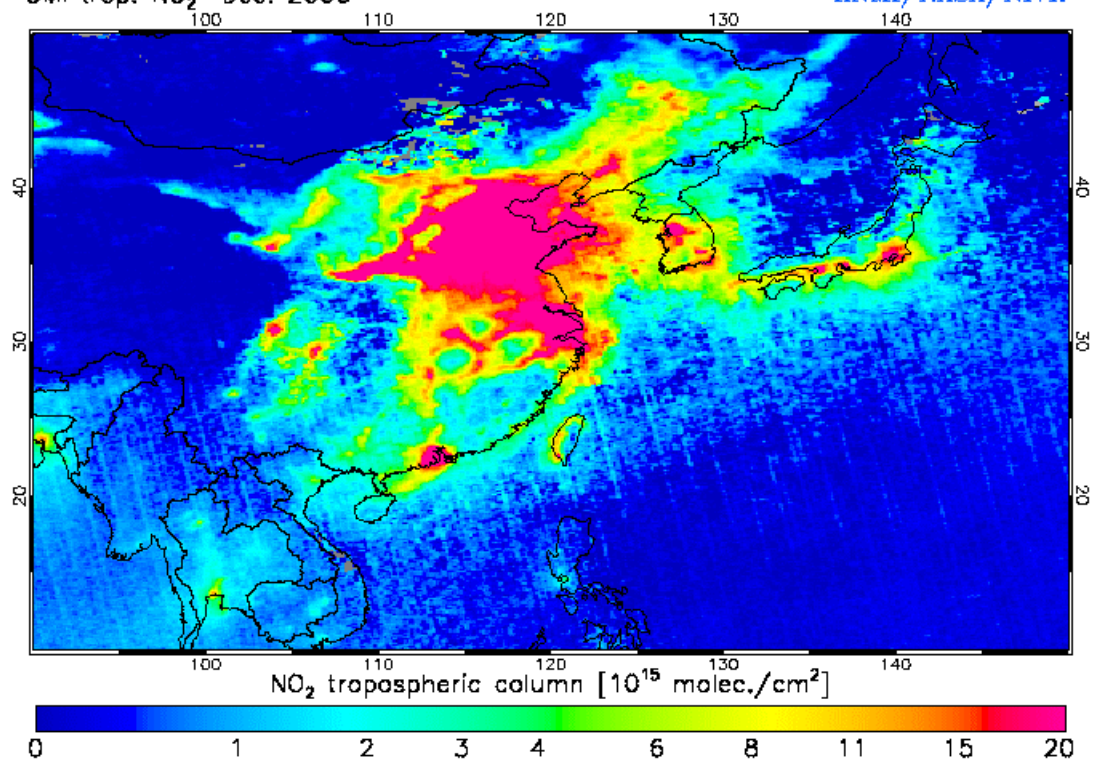



OMI trop. NO<sub>2</sub> Jan. 2007

KNMI/NASA/NIVR

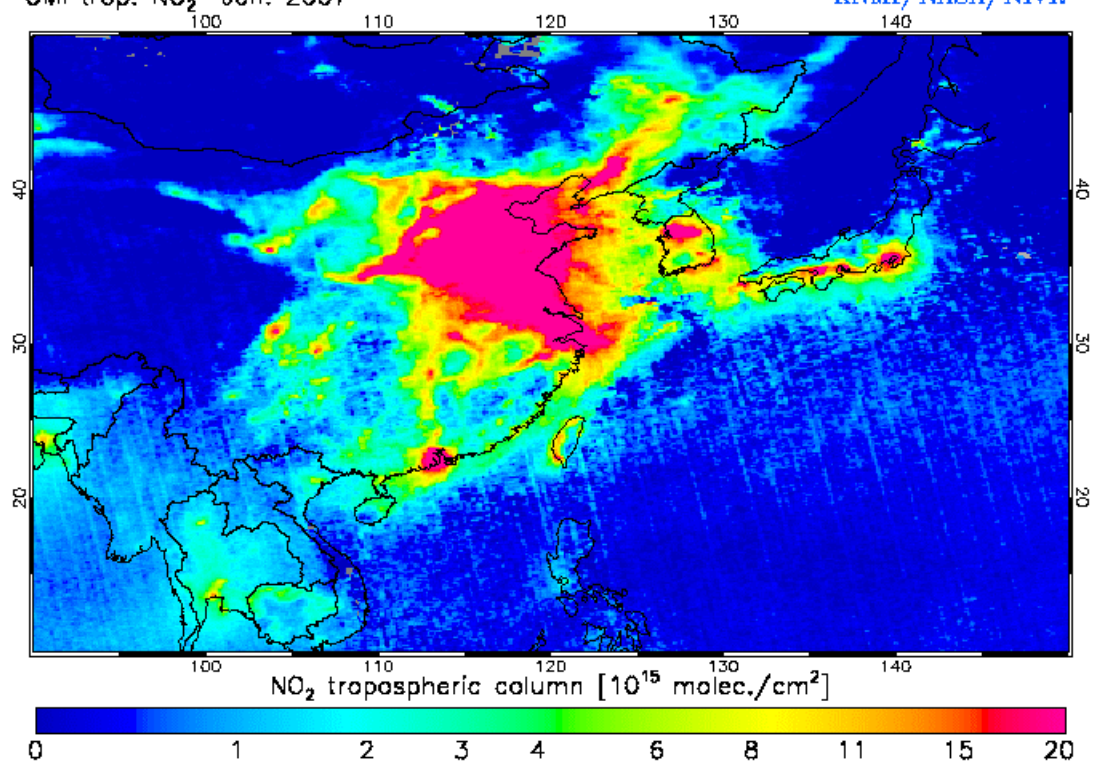

OMI trop. NO<sub>2</sub> Feb. 2007

KNMI/NASA/NIVR

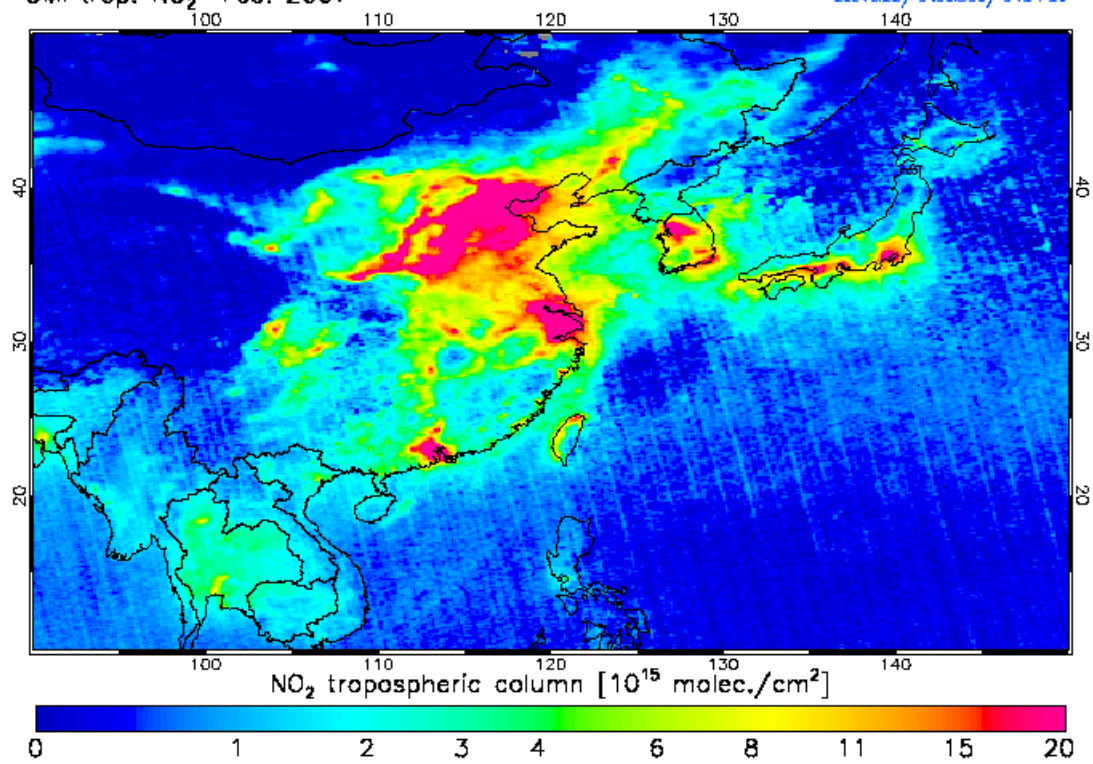

Supplement: Supplementary file 1 [file acp-10-5641-2010-supplement.zip]
