# Supplementary material for: Spatial distribution and interannual variation of surface PM 10 concentrations over eighty-six Chinese cities
Source: Copernicus journal article supplement (doi:10.5194/acp-10-5641-2010), 2010-06-29
Supplement: Supplementary file 2 [file acp-10-5641-2010-supplement.zip]

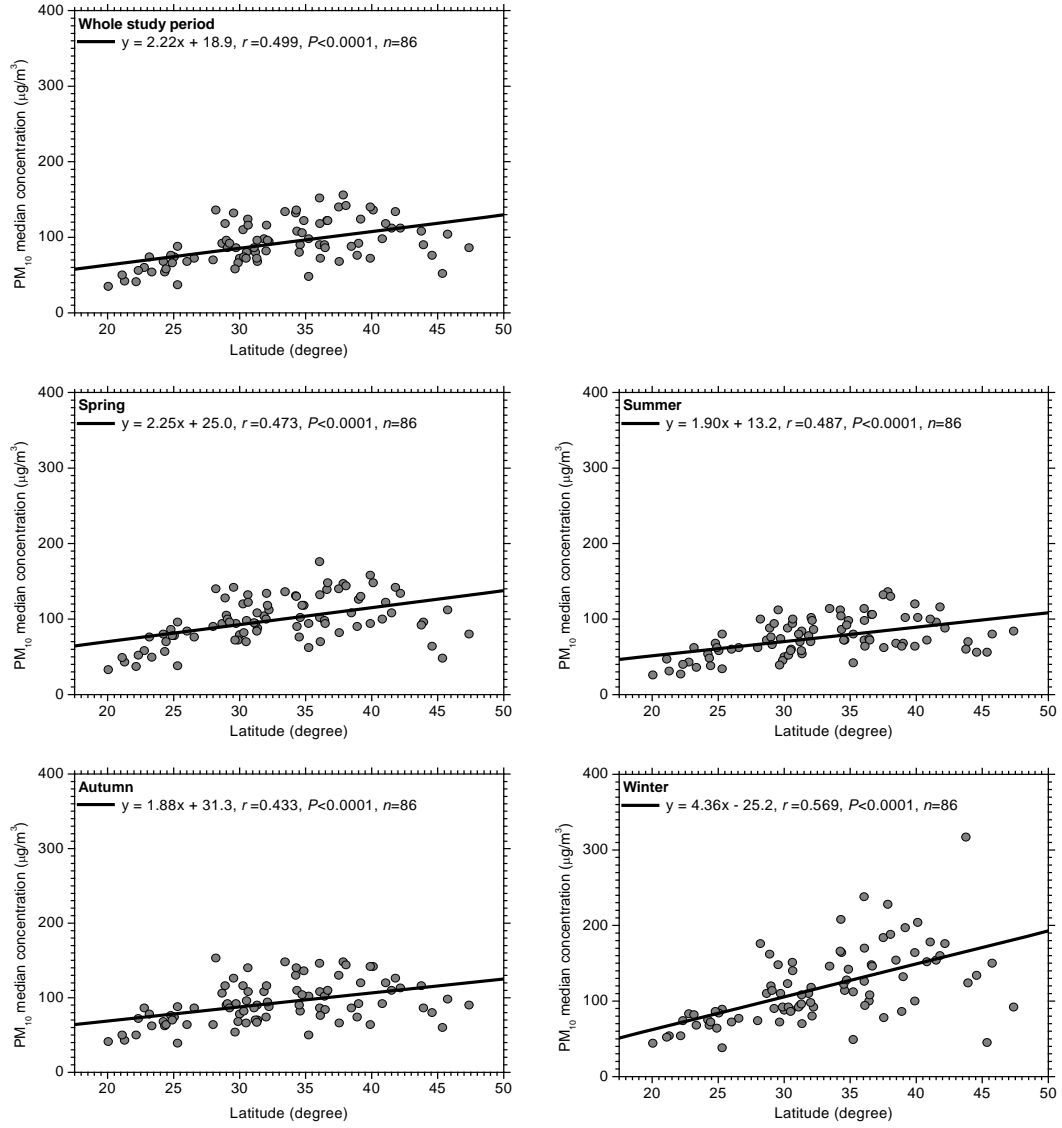

**Fig. S3.** Latitudinal gradients in PM<sub>10</sub> median concentration for the eighty-six cities in different seasons. The latitudinal gradient (north to south decrease) of PM<sub>10</sub> levels in mid-eastern China (longitude 100°E to 130°E) was illustrated by significant linear fittings ( $p < 0.0001$  significance) of PM<sub>10</sub> median concentration with latitude of the cities. These linear regressions did reveal that there were lower PM<sub>10</sub> levels in the southern cities than in the middle or northern cities. The slope of these fittings was the largest in winter, more than twofold those in summer and autumn, indicating larger north to south PM<sub>10</sub> gradient in winter.

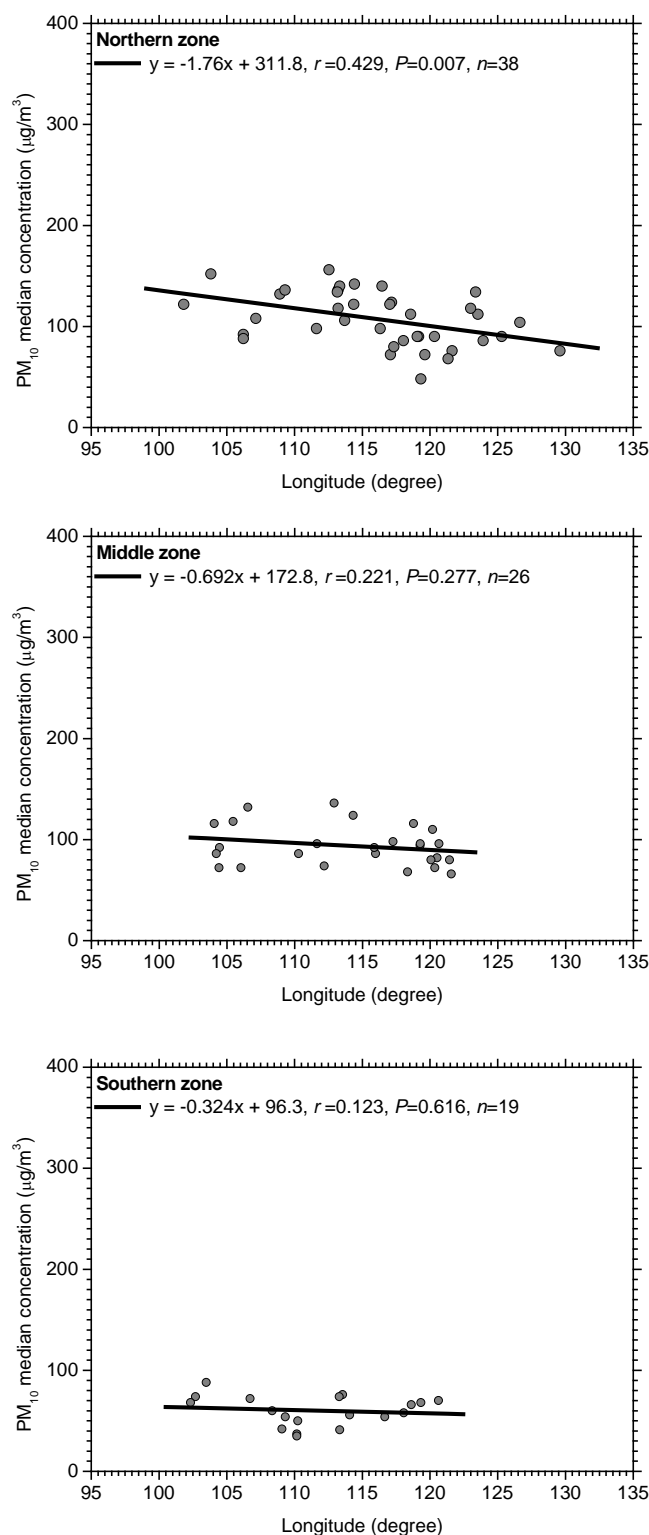

**Fig. S4.** Longitudinal gradients in PM<sub>10</sub> median concentration for (top) the thirty-eight cities in the northern zone, (middle) the twenty-six cities in the middle zone, and (bottom) the nineteen cities in the southern zone. Linear fitting of PM<sub>10</sub> median concentration with longitude was significant ( $p < 0.01$  significance) for the thirty-eight northern cities (top). While for the cities in the middle zone (middle) and the southern zone (bottom), PM<sub>10</sub> concentrations also generally exhibited a decreasing trend from west to east, but the longitudinal differences in those cases were smaller and linear fittings of PM<sub>10</sub> concentrations with longitudes were not significant (not passed the 95% confidence level test) for these cities.
