# Supplementary material for: Spatial distribution and interannual variation of surface PM 10 concentrations over eighty-six Chinese cities
Source: Copernicus journal article supplement (doi:10.5194/acp-10-5641-2010), 2010-06-29
Supplement: Supplementary file 3 [file acp-10-5641-2010-supplement.zip]

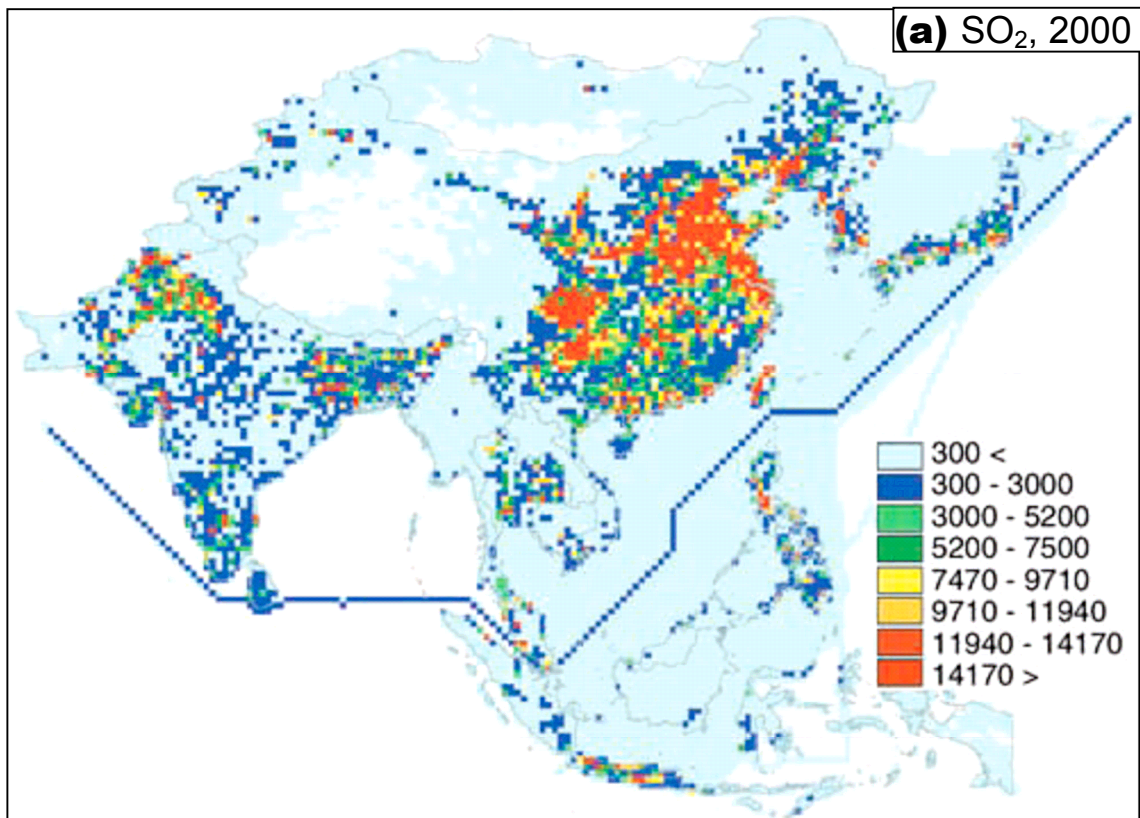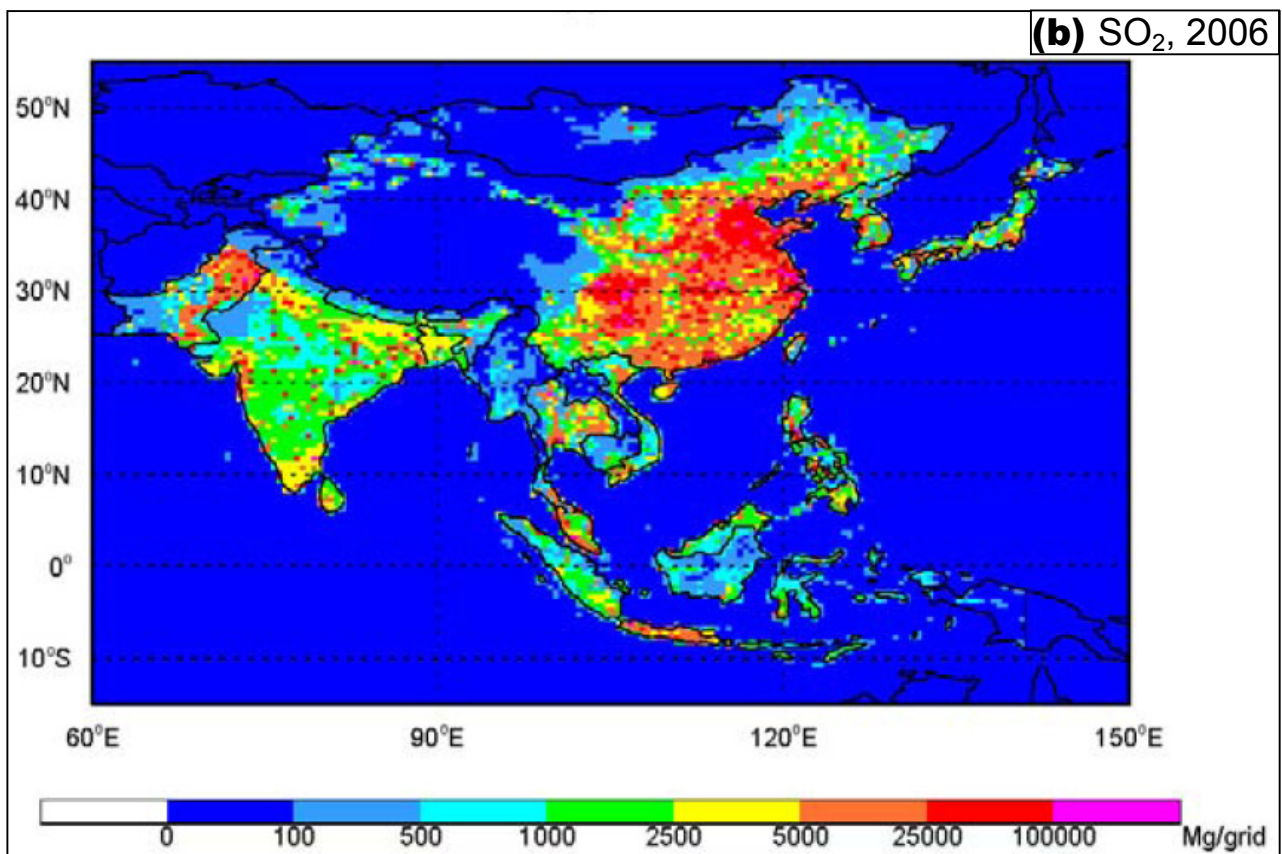

**Fig. S5 (a) and (b)** A comparison of anthropogenic SO<sub>2</sub> emission distributions at 30 min×30 min resolution (units: Mg/year per grid) in year 2000 versus year 2006 (after Streets et al, 2003; Zhang et al., 2009). The areas with emission > 5200 in 2000 (indicated by green-yellow-red) were separately distributed over central-eastern China, while those areas with emission > 5000 (indicated by orange-red-magenta) extended significantly to intense regional sources in eastern China, the Yangtze River Delta region (YRD), the Pearl River Delta region (PRD), the Sichuan Basin (SCB) and Guizhou Province.

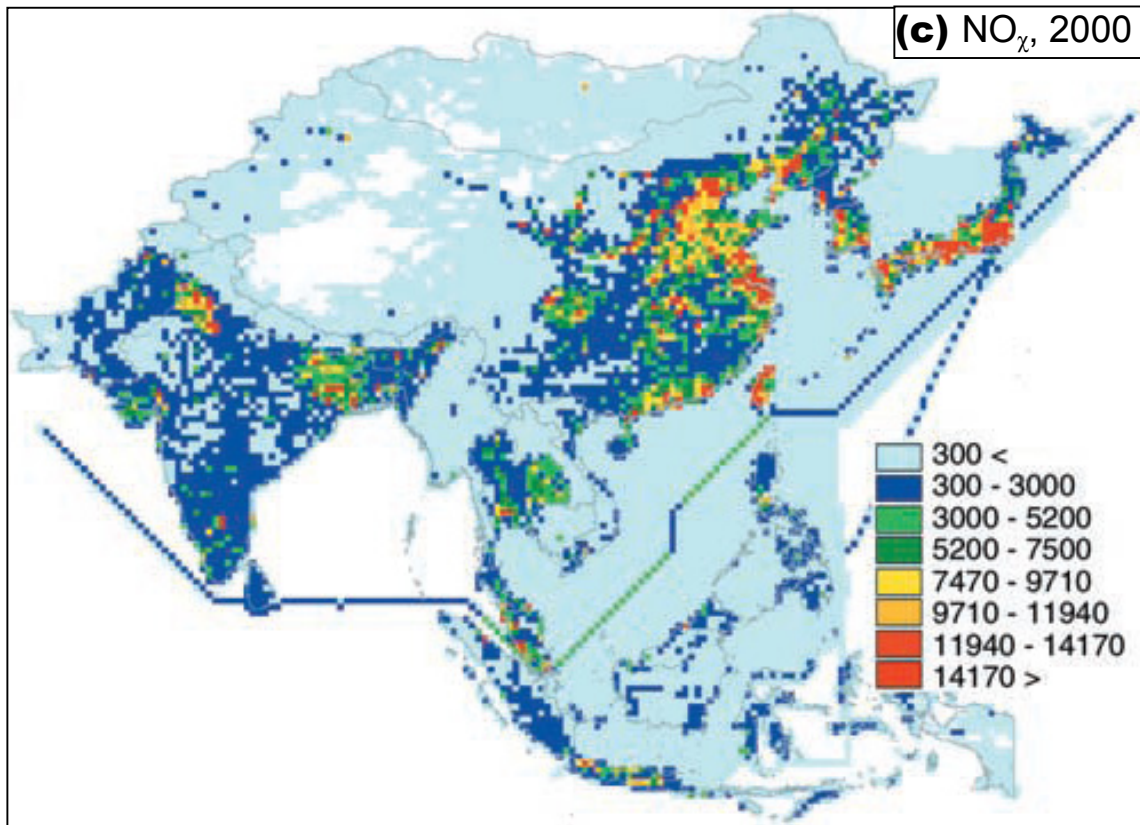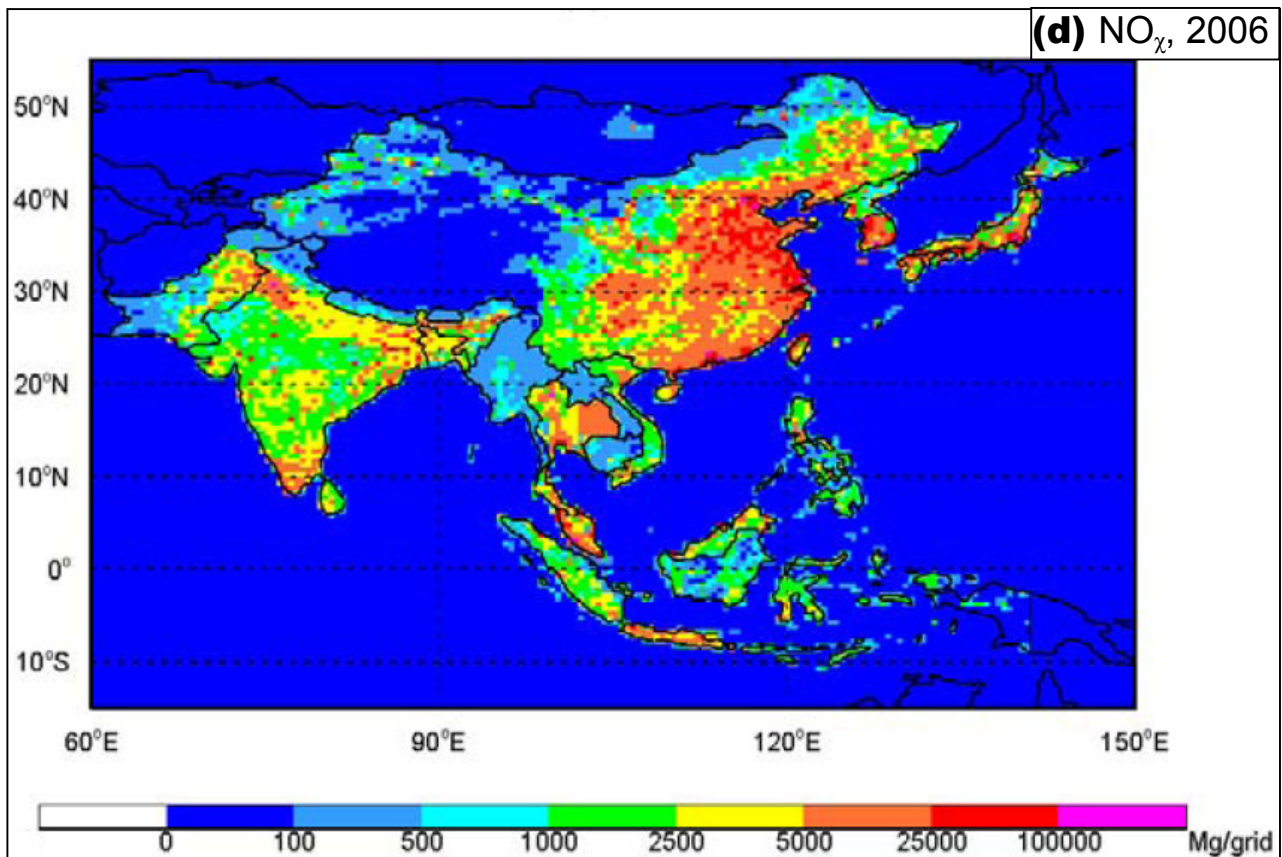

**Fig. S5 (c) and (d)** A comparison of anthropogenic NO<sub>x</sub> emission distributions at 30 min×30 min resolution (units: Mg/year per grid) in year 2000 versus year 2006 (after Streets et al, 2003; Zhang et al., 2009). The areas with emission > 5200 in 2000 (indicated by green-yellow-red) were dispersedly distributed over central-eastern China, while those areas with emission > 5000 (indicated by orange-red-magenta) extended significantly to intense regional sources in eastern China, YRD, PRD, SCB and Guizhou Province.

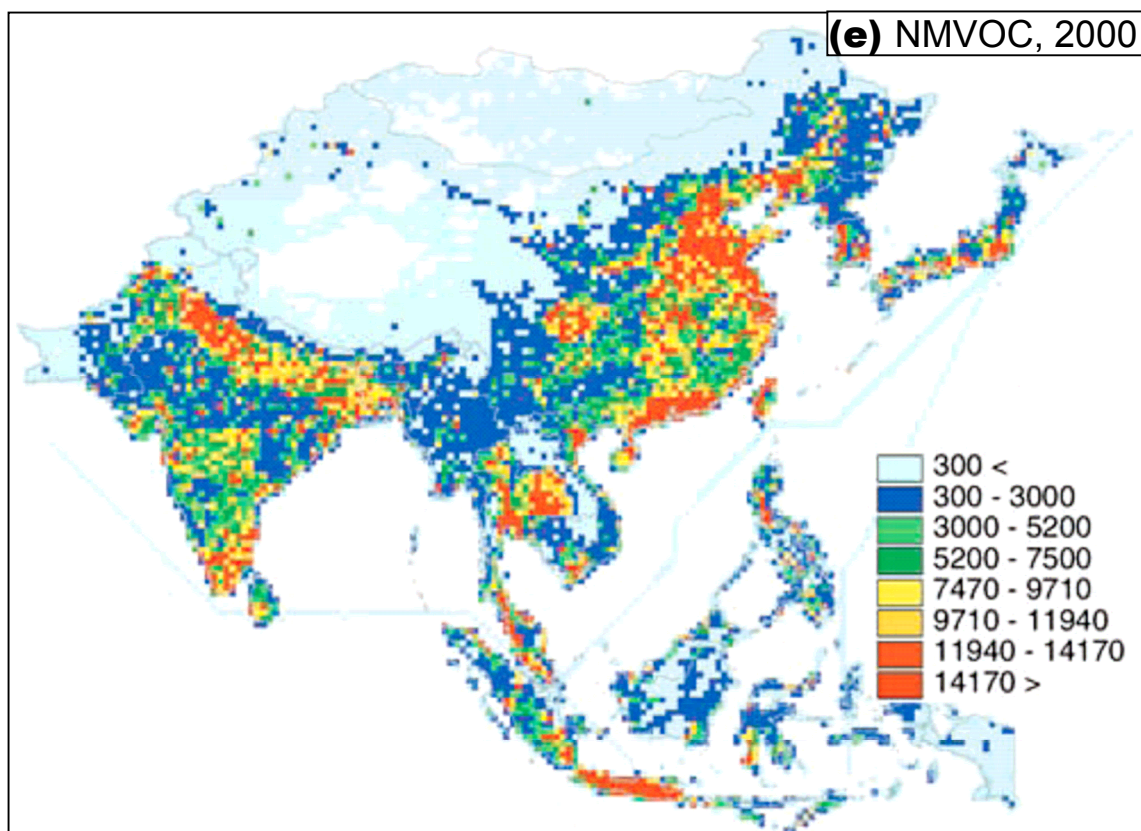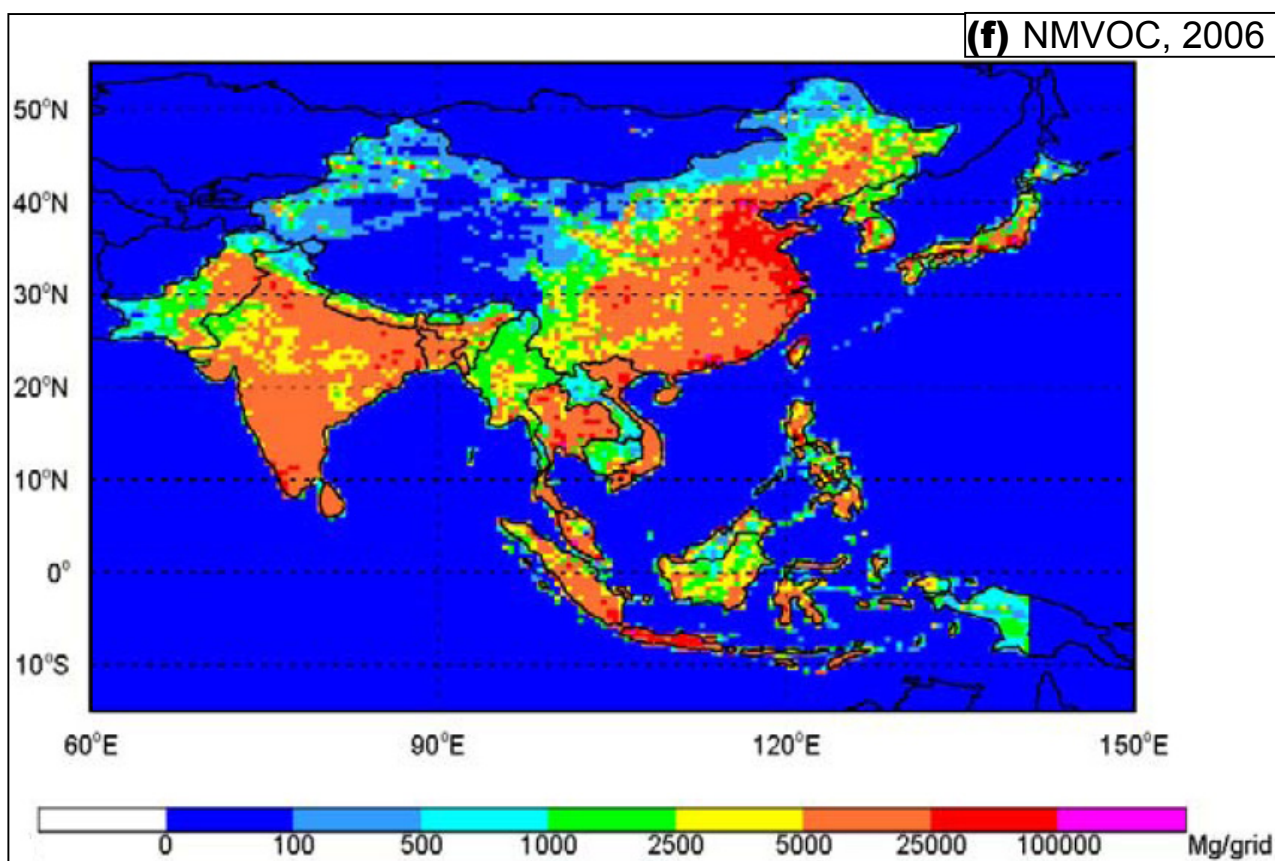

**Fig. S5 (e) and (f)** A comparison of anthropogenic NMVOC (nonmethane volatile organic compounds) emission distributions at 30 min×30 min resolution (units: Mg/year per grid) in year 2000 versus year 2006 (after Streets et al, 2003; Zhang et al., 2009). The areas with emission > 5200 in 2000 (indicated by green-yellow-red) were distributed in three separated regions including eastern China, central-southern China, SCB and Guizhou Province, while those areas with emission > 5000 (indicated by orange-red-magenta) extended and joined to an entire intense area-source in central-eastern China.

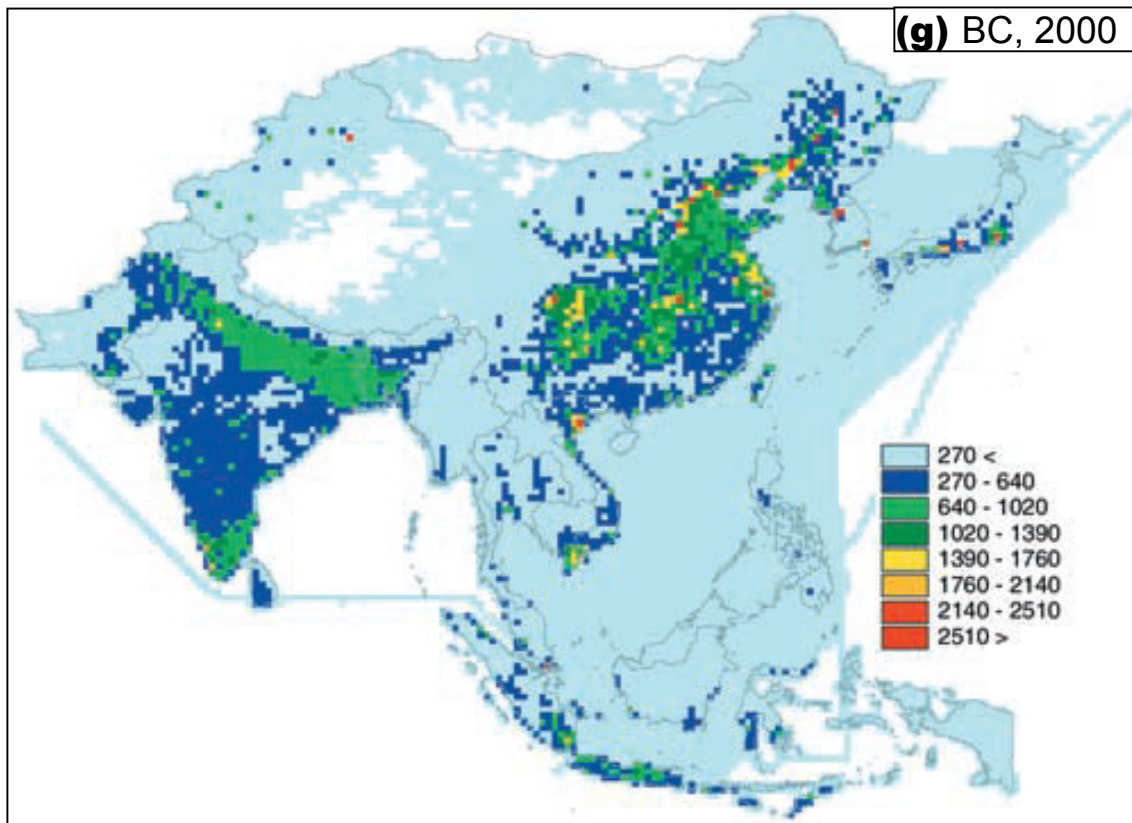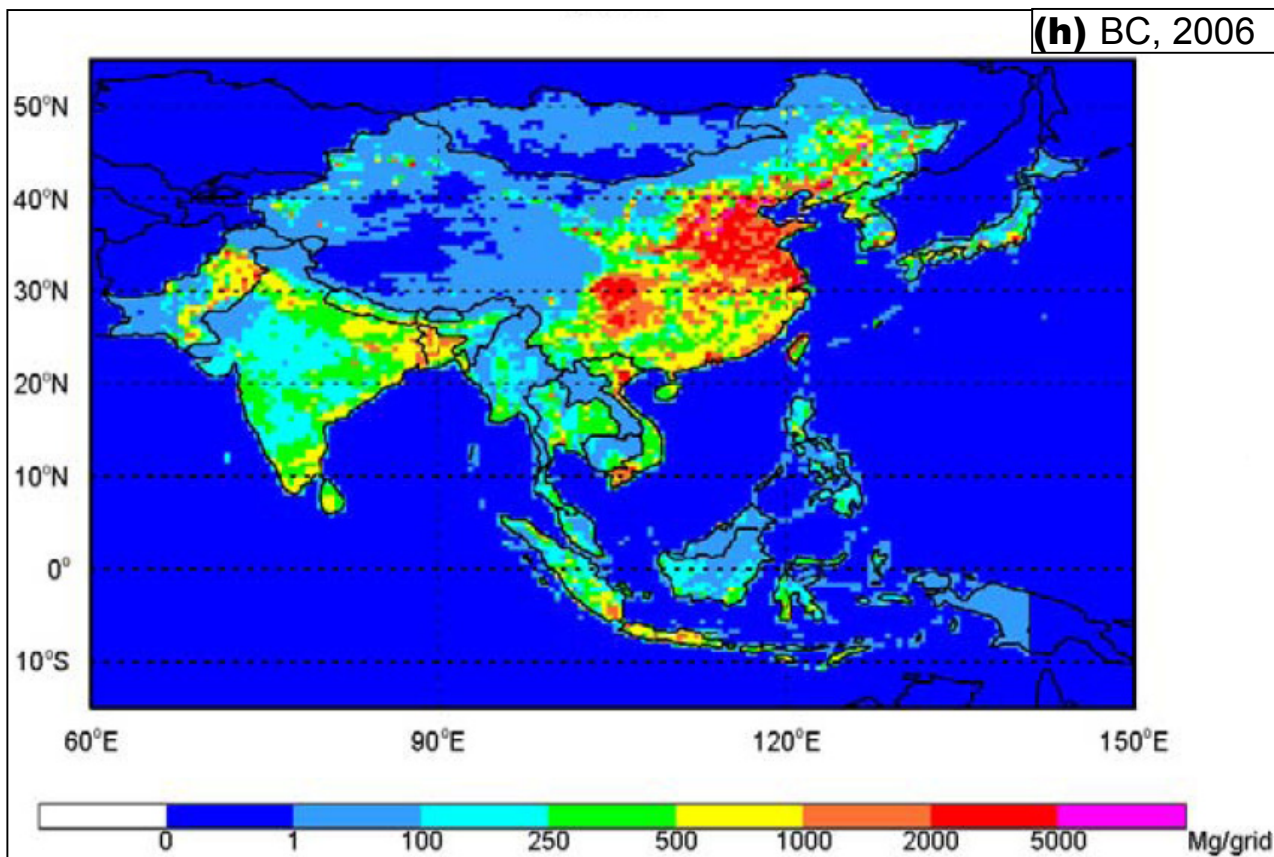

**Fig. S5 (g) and (h)** A comparison of anthropogenic black carbon (BC) emission distributions at 30 min×30 min resolution (units: Mg/year per grid) in year 2000 versus year 2006 (after Streets et al., 2003; Zhang et al., 2009). The areas with emission > 1020 in 2000 (indicated by green-yellow-red) were sporadically distributed over central-eastern China, while those areas with emission > 1000 (indicated by orange-red-magenta) extended significantly to intense regional sources in eastern China, SCB and Guizhou Province, the northern part of YRD, as well as some areas of PRD.

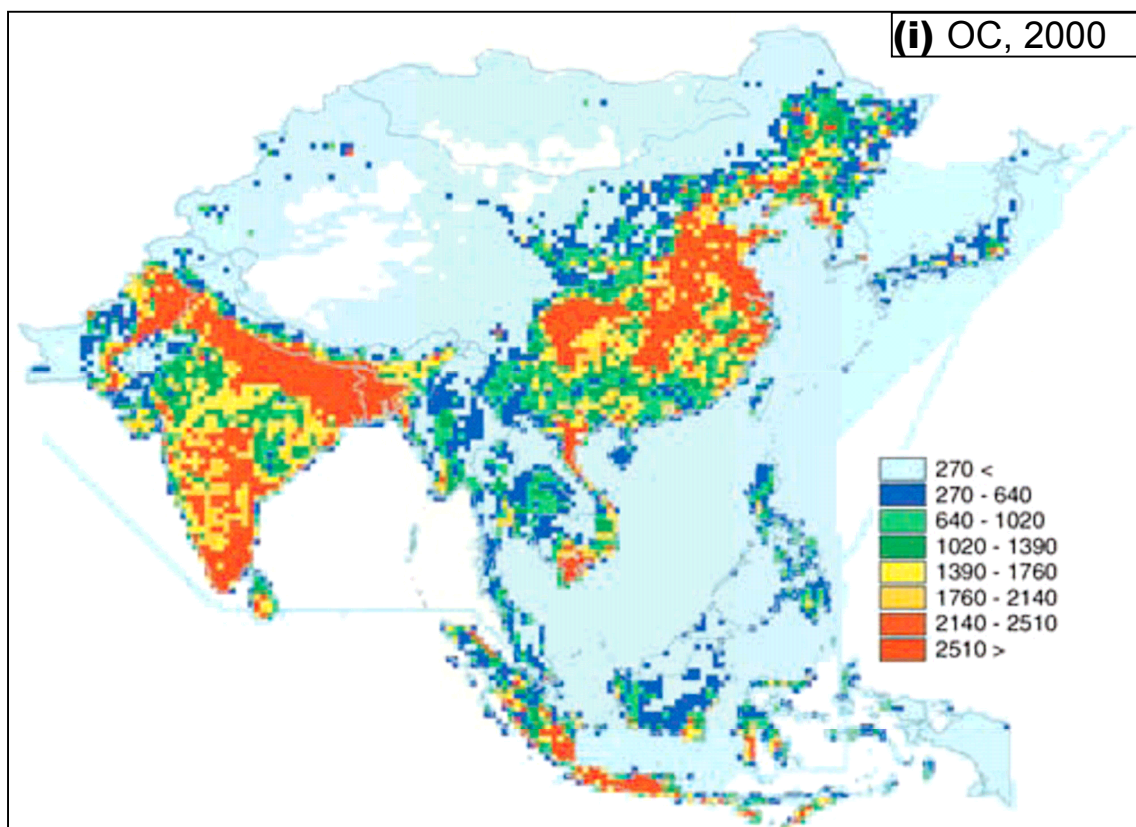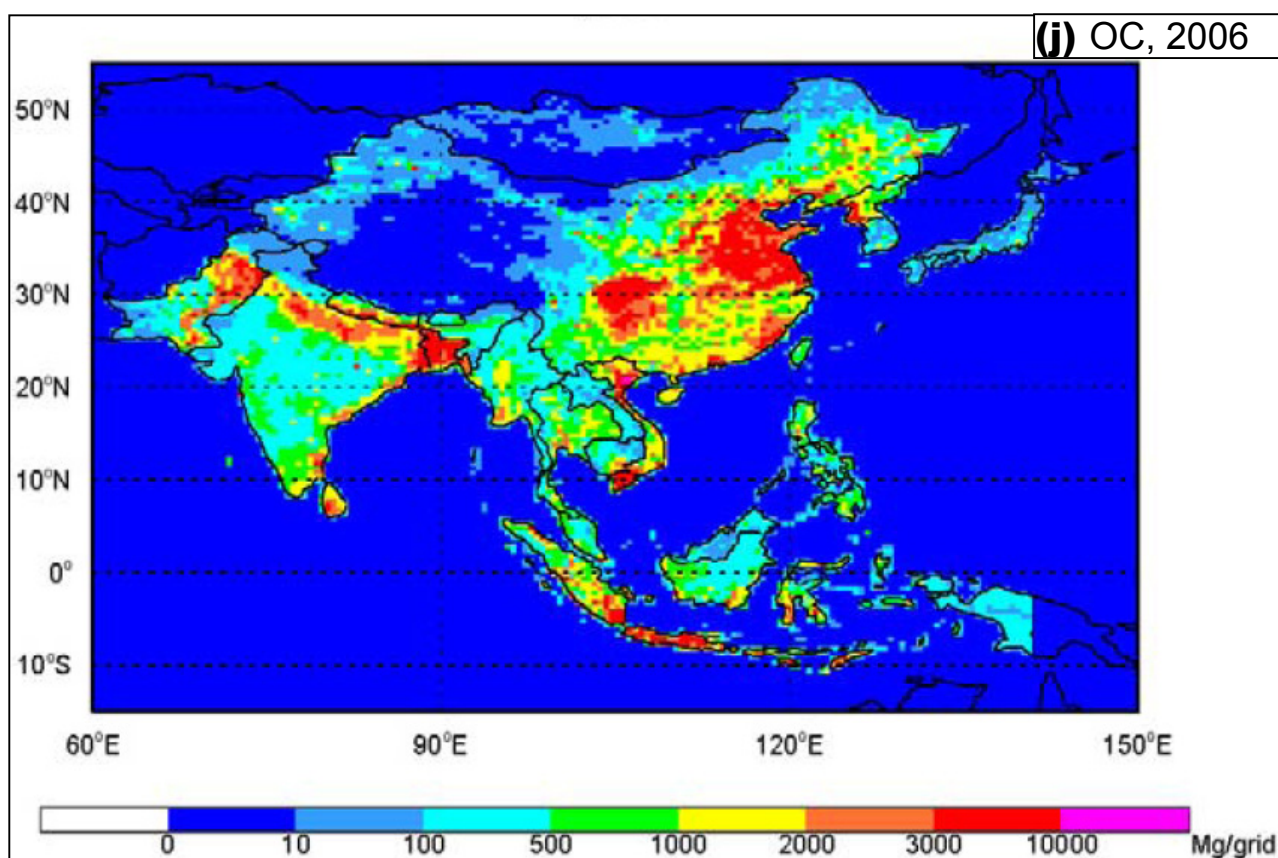

**Fig. S5 (i) and (j)** A comparison of anthropogenic organic carbon (OC) emission distributions at 30 min×30 min resolution (units: Mg/year per grid) in year 2000 versus year 2006 (after Streets et al, 2003; Zhang et al., 2009). In contrast, OC emission distribution showed no significant extension from 2000 to 2006 (even with a decreasing tendency in areas such as Hubei Providence and Hunan Province); this is consistent with the decrease in OC emission estimation from 3.4 Tg in 2000 to 3.2 Tg in 2006.

## References:

Streets, D. G., Bond, T. C., Carmichael, G. R., Fernandes, S. D., Fu, Q., He, D., Klimont, Z., Nelson, S. M., Tsai, N. Y., Wang, M. Q., Woo, J. -H., and Yarber, K. F.: An inventory of gaseous and primary aerosol emissions in Asia in the year 2000, *J. Geophys. Res.*, 108(D21), 8809, doi:10.1029/2002JD003093, 2003.

Zhang, Q., Streets, D. G., Carmichael, G. R., He, K. B., Huo, H., Kannari, A., Klimont, Z., Park, I. S., Reddy, S., Fu, J. S., Chen, D., Duan, L., Lei, Y., Wang, L. T., and Yao, Z. L.: Asian emissions in 2006 for the NASA INTEX-B mission, *Atmos. Chem. Phys.*, 9, 5131–5153, 2009, <http://www.atmos-chem-phys.net/9/5131/2009/>.
