# Supplementary material for: Spatial distribution and interannual variation of surface PM 10 concentrations over eighty-six Chinese cities
Source: Copernicus journal article supplement (doi:10.5194/acp-10-5641-2010), 2010-06-29
Supplement: Supplementary file 4 [file acp-10-5641-2010-supplement.zip]

**Table S1.** Pearson correlation coefficients between the daily air pollution indexes (APIs) of 86 Chinese cities from June 2000 to February 2007

|    |    |    |    |    |    |    |    |    |    |    |    |    |    |    |    |    |    |    |    |    |    |    |     |    |    |    |    |    |    |    |    |    |    |    |    |    |    |    |    |    |    |    |    |    |    |    |    |    |    |   |    |    |    |    |    |     |    |    |    |    |     |    |     |    |    |    |    |    |    |    |    |    |    |    |    |    |    |    |    |    |    |    |    |    |    |    |    |    |    |    |    |    |    |    |    |    |    |    |    |    |    |    |    |    |    |    |    |     |    |    |    |    |    |    |    |    |    |    |    |    |    |    |    |    |    |    |    |    |    |    |    |    |    |    |   |    |    |    |    |    |     |    |    |    |    |     |    |     |    |    |    |    |    |    |    |    |    |    |    |    |    |    |    |    |    |    |    |    |    |    |    |    |    |    |    |    |    |    |    |    |    |    |    |    |    |    |    |    |    |    |    |    |     |    |    |    |    |    |    |    |    |    |    |    |    |    |    |    |    |    |    |    |    |    |    |    |    |    |    |   |    |    |    |    |    |     |    |    |    |    |     |    |     |    |    |    |    |    |    |    |    |    |    |    |    |    |    |    |    |    |    |    |    |    |    |    |    |    |    |    |    |    |    |    |    |    |    |    |    |    |    |    |    |    |    |    |    |     |    |    |    |    |    |    |    |    |    |    |    |    |    |    |    |    |    |    |    |    |    |    |    |    |    |    |   |    |    |    |    |    |     |    |    |    |    |     |    |     |    |    |    |    |    |    |    |    |    |    |    |    |    |    |    |    |    |    |    |    |    |    |    |    |    |    |    |    |    |    |    |    |    |    |    |    |    |    |    |    |    |    |    |    |     |    |    |    |    |    |    |    |    |    |    |    |    |    |    |    |    |    |    |    |    |    |    |    |    |    |    |   |    |    |    |    |    |     |    |    |    |    |     |    |     |    |    |    |    |    |    |    |    |    |    |    |    |    |    |    |    |    |    |    |    |    |    |    |    |    |    |    |    |    |    |    |    |    |    |    |    |    |    |    |    |    |    |    |    |     |    |    |    |    |    |    |    |    |    |    |    |    |    |    |    |    |    |    |    |    |    |    |    |    |    |    |   |    |    |    |    |    |     |    |    |    |    |     |    |     |    |    |    |    |    |    |    |    |    |    |    |    |    |    |    |    |    |    |    |    |    |    |    |    |    |    |    |    |    |    |    |    |    |    |    |    |    |    |    |    |    |    |    |    |     |    |    |    |    |    |    |    |    |    |    |    |    |    |    |    |    |    |    |    |    |    |    |    |    |    |    |   |    |    |    |    |    |     |    |    |    |    |     |    |     |    |    |    |    |    |    |    |    |    |    |    |    |    |    |    |    |    |    |    |    |    |    |    |    |    |    |    |    |    |    |    |    |    |    |    |    |    |    |    |    |    |    |    |    |     |    |    |    |    |    |    |    |    |    |    |    |    |    |    |    |    |    |    |    |    |    |    |    |    |    |    |   |    |    |    |    |    |     |    |    |    |    |     |    |     |    |    |    |    |    |    |    |    |    |    |    |    |    |    |    |    |    |    |    |    |    |    |    |    |    |    |    |    |    |    |    |    |    |    |    |    |    |    |    |    |    |    |    |    |     |    |    |    |    |    |    |    |    |    |    |    |    |    |    |    |    |    |    |    |    |    |    |    |    |    |    |   |    |    |    |    |    |     |    |    |    |    |     |    |     |    |    |    |    |    |    |    |    |    |    |    |    |    |    |    |    |    |    |    |    |    |    |    |    |    |    |    |    |    |    |    |    |    |    |    |    |    |    |    |    |    |    |    |    |     |    |    |    |    |    |    |    |    |    |    |    |    |    |    |    |    |    |    |    |    |    |    |    |    |    |    |   |    |    |    |    |    |     |    |    |    |    |     |    |     |    |    |    |    |    |    |    |    |    |    |    |    |    |    |    |    |    |    |    |    |    |    |    |    |    |    |    |    |    |    |    |    |    |    |    |    |    |    |    |    |    |    |    |    |     |    |    |    |    |    |    |    |    |    |    |    |    |    |    |    |    |    |    |    |    |    |    |    |    |    |    |   |    |    |    |    |    |     |    |    |    |    |     |    |     |    |    |    |    |    |    |    |    |    |    |    |    |    |    |    |    |    |    |    |    |    |    |    |    |    |    |    |    |    |    |    |    |    |    |    |    |    |    |    |    |    |    |    |    |     |    |    |    |    |    |    |    |    |    |    |    |    |    |    |    |    |    |    |    |    |    |    |    |    |    |    |   |    |    |    |    |    |     |    |    |    |    |     |    |     |    |    |    |    |    |    |    |    |    |    |    |    |    |    |    |    |    |    |    |    |    |    |    |    |    |    |    |    |    |    |    |    |    |    |    |    |    |    |    |    |    |    |    |    |     |    |    |    |    |    |    |    |    |    |    |    |    |    |    |    |    |    |    |    |    |    |    |    |    |    |    |   |    |    |    |    |    |     |    |    |    |    |     |    |     |    |    |    |    |    |    |    |    |    |    |    |    |    |    |    |    |    |    |    |    |    |    |    |    |    |    |    |    |    |    |    |    |    |    |    |    |    |    |    |    |    |    |    |    |     |    |    |    |    |    |    |    |    |    |    |    |    |    |    |    |    |    |    |    |    |    |    |    |    |    |    |   |    |    |    |    |    |     |    |    |    |    |     |    |     |    |    |    |    |    |    |    |    |    |    |    |    |    |    |    |    |    |    |    |    |    |    |    |    |    |    |    |    |    |    |    |    |    |    |    |    |    |    |    |    |    |    |    |    |     |    |    |    |    |    |    |    |    |    |    |    |    |    |    |    |    |    |    |    |    |    |    |    |    |    |    |   |    |    |    |    |    |     |    |    |    |    |     |    |     |    |    |    |    |    |    |    |    |    |    |    |    |    |    |    |    |    |    |    |    |    |    |    |    |    |    |    |    |    |    |    |    |    |    |    |    |    |    |    |    |    |    |    |    |     |    |    |    |    |    |    |    |    |    |    |    |    |    |    |    |    |    |    |    |    |    |    |    |    |    |    |   |    |    |    |    |    |     |    |    |    |    |     |    |     |    |    |    |    |    |    |    |    |    |    |    |    |    |    |    |    |    |    |    |    |    |    |    |    |    |    |    |    |    |    |    |    |    |    |    |    |    |    |    |    |    |    |    |    |     |    |    |    |    |    |    |    |    |    |    |    |    |    |    |    |    |    |    |    |    |    |    |    |    |    |    |   |    |    |    |    |    |     |    |    |    |    |     |    |     |    |    |    |    |    |    |    |    |    |    |    |    |    |    |    |    |    |    |    |    |    |    |    |    |    |    |    |    |    |    |    |    |    |    |    |    |    |    |    |    |    |    |    |    |     |    |    |    |    |    |    |    |    |    |    |    |    |    |    |    |    |    |    |    |    |    |    |    |    |    |    |   |    |    |    |    |    |     |    |    |    |    |     |    |     |    |    |    |    |    |    |    |    |    |    |    |    |    |    |    |    |    |    |    |    |    |    |    |    |    |    |    |    |    |    |    |    |    |    |    |    |    |    |    |    |    |    |    |    |     |    |    |    |    |    |    |    |    |    |    |    |    |    |    |    |    |    |    |    |    |    |    |    |    |    |    |   |    |    |    |    |    |     |    |    |    |    |     |    |     |    |    |    |    |    |    |    |    |    |    |    |    |    |    |    |    |    |    |    |    |    |    |    |    |    |    |    |    |    |    |    |    |    |    |    |    |    |    |    |    |    |    |    |    |     |    |    |    |    |    |    |    |    |    |    |    |    |    |    |    |    |    |    |    |    |    |    |    |    |    |    |   |    |    |    |    |    |     |    |    |    |    |     |    |     |    |    |    |    |    |    |    |    |    |    |    |    |    |    |    |    |    |    |    |    |    |    |    |    |    |    |    |    |    |    |    |    |    |    |    |    |    |    |    |    |    |    |    |    |     |    |    |    |    |    |    |    |    |    |    |    |    |    |    |    |    |    |    |    |    |    |    |    |    |    |    |   |    |    |    |    |    |     |    |    |    |    |     |    |     |    |    |    |    |    |    |    |    |    |    |    |    |    |    |    |    |    |    |    |    |    |    |    |    |    |    |    |    |    |    |    |    |    |    |    |    |    |    |    |    |    |    |    |    |     |    |    |    |    |    |    |    |    |    |    |    |    |    |    |    |    |    |    |    |    |    |    |    |    |    |    |   |    |    |    |    |    |     |    |    |    |    |     |    |     |    |    |    |    |    |    |    |    |    |    |    |    |    |    |    |    |    |    |    |    |    |    |    |    |    |    |    |    |    |    |    |    |    |    |    |    |    |    |    |    |    |    |    |    |     |    |    |    |    |    |    |    |    |    |    |    |    |    |    |    |    |    |    |    |    |    |    |    |    |    |    |   |    |    |    |    |    |     |    |    |    |    |     |    |     |    |    |    |    |    |    |    |    |    |    |    |    |    |    |    |    |    |    |    |    |    |    |    |    |    |    |    |    |    |    |    |    |    |    |    |    |    |    |    |    |    |    |    |    |     |    |    |    |    |    |    |    |    |    |    |    |    |    |    |    |    |    |    |    |    |    |    |    |    |    |    |   |    |    |    |    |    |     |    |    |    |    |     |    |     |    |    |    |    |      |
|----|----|----|----|----|----|----|----|----|----|----|----|----|----|----|----|----|----|----|----|----|----|----|-----|----|----|----|----|----|----|----|----|----|----|----|----|----|----|----|----|----|----|----|----|----|----|----|----|----|----|---|----|----|----|----|----|-----|----|----|----|----|-----|----|-----|----|----|----|----|----|----|----|----|----|----|----|----|----|----|----|----|----|----|----|----|----|----|----|----|----|----|----|----|----|----|----|----|----|----|----|----|----|----|----|----|----|----|----|----|-----|----|----|----|----|----|----|----|----|----|----|----|----|----|----|----|----|----|----|----|----|----|----|----|----|----|----|---|----|----|----|----|----|-----|----|----|----|----|-----|----|-----|----|----|----|----|----|----|----|----|----|----|----|----|----|----|----|----|----|----|----|----|----|----|----|----|----|----|----|----|----|----|----|----|----|----|----|----|----|----|----|----|----|----|----|----|-----|----|----|----|----|----|----|----|----|----|----|----|----|----|----|----|----|----|----|----|----|----|----|----|----|----|----|---|----|----|----|----|----|-----|----|----|----|----|-----|----|-----|----|----|----|----|----|----|----|----|----|----|----|----|----|----|----|----|----|----|----|----|----|----|----|----|----|----|----|----|----|----|----|----|----|----|----|----|----|----|----|----|----|----|----|----|-----|----|----|----|----|----|----|----|----|----|----|----|----|----|----|----|----|----|----|----|----|----|----|----|----|----|----|---|----|----|----|----|----|-----|----|----|----|----|-----|----|-----|----|----|----|----|----|----|----|----|----|----|----|----|----|----|----|----|----|----|----|----|----|----|----|----|----|----|----|----|----|----|----|----|----|----|----|----|----|----|----|----|----|----|----|----|-----|----|----|----|----|----|----|----|----|----|----|----|----|----|----|----|----|----|----|----|----|----|----|----|----|----|----|---|----|----|----|----|----|-----|----|----|----|----|-----|----|-----|----|----|----|----|----|----|----|----|----|----|----|----|----|----|----|----|----|----|----|----|----|----|----|----|----|----|----|----|----|----|----|----|----|----|----|----|----|----|----|----|----|----|----|----|-----|----|----|----|----|----|----|----|----|----|----|----|----|----|----|----|----|----|----|----|----|----|----|----|----|----|----|---|----|----|----|----|----|-----|----|----|----|----|-----|----|-----|----|----|----|----|----|----|----|----|----|----|----|----|----|----|----|----|----|----|----|----|----|----|----|----|----|----|----|----|----|----|----|----|----|----|----|----|----|----|----|----|----|----|----|----|-----|----|----|----|----|----|----|----|----|----|----|----|----|----|----|----|----|----|----|----|----|----|----|----|----|----|----|---|----|----|----|----|----|-----|----|----|----|----|-----|----|-----|----|----|----|----|----|----|----|----|----|----|----|----|----|----|----|----|----|----|----|----|----|----|----|----|----|----|----|----|----|----|----|----|----|----|----|----|----|----|----|----|----|----|----|----|-----|----|----|----|----|----|----|----|----|----|----|----|----|----|----|----|----|----|----|----|----|----|----|----|----|----|----|---|----|----|----|----|----|-----|----|----|----|----|-----|----|-----|----|----|----|----|----|----|----|----|----|----|----|----|----|----|----|----|----|----|----|----|----|----|----|----|----|----|----|----|----|----|----|----|----|----|----|----|----|----|----|----|----|----|----|----|-----|----|----|----|----|----|----|----|----|----|----|----|----|----|----|----|----|----|----|----|----|----|----|----|----|----|----|---|----|----|----|----|----|-----|----|----|----|----|-----|----|-----|----|----|----|----|----|----|----|----|----|----|----|----|----|----|----|----|----|----|----|----|----|----|----|----|----|----|----|----|----|----|----|----|----|----|----|----|----|----|----|----|----|----|----|----|-----|----|----|----|----|----|----|----|----|----|----|----|----|----|----|----|----|----|----|----|----|----|----|----|----|----|----|---|----|----|----|----|----|-----|----|----|----|----|-----|----|-----|----|----|----|----|----|----|----|----|----|----|----|----|----|----|----|----|----|----|----|----|----|----|----|----|----|----|----|----|----|----|----|----|----|----|----|----|----|----|----|----|----|----|----|----|-----|----|----|----|----|----|----|----|----|----|----|----|----|----|----|----|----|----|----|----|----|----|----|----|----|----|----|---|----|----|----|----|----|-----|----|----|----|----|-----|----|-----|----|----|----|----|----|----|----|----|----|----|----|----|----|----|----|----|----|----|----|----|----|----|----|----|----|----|----|----|----|----|----|----|----|----|----|----|----|----|----|----|----|----|----|----|-----|----|----|----|----|----|----|----|----|----|----|----|----|----|----|----|----|----|----|----|----|----|----|----|----|----|----|---|----|----|----|----|----|-----|----|----|----|----|-----|----|-----|----|----|----|----|----|----|----|----|----|----|----|----|----|----|----|----|----|----|----|----|----|----|----|----|----|----|----|----|----|----|----|----|----|----|----|----|----|----|----|----|----|----|----|----|-----|----|----|----|----|----|----|----|----|----|----|----|----|----|----|----|----|----|----|----|----|----|----|----|----|----|----|---|----|----|----|----|----|-----|----|----|----|----|-----|----|-----|----|----|----|----|----|----|----|----|----|----|----|----|----|----|----|----|----|----|----|----|----|----|----|----|----|----|----|----|----|----|----|----|----|----|----|----|----|----|----|----|----|----|----|----|-----|----|----|----|----|----|----|----|----|----|----|----|----|----|----|----|----|----|----|----|----|----|----|----|----|----|----|---|----|----|----|----|----|-----|----|----|----|----|-----|----|-----|----|----|----|----|----|----|----|----|----|----|----|----|----|----|----|----|----|----|----|----|----|----|----|----|----|----|----|----|----|----|----|----|----|----|----|----|----|----|----|----|----|----|----|----|-----|----|----|----|----|----|----|----|----|----|----|----|----|----|----|----|----|----|----|----|----|----|----|----|----|----|----|---|----|----|----|----|----|-----|----|----|----|----|-----|----|-----|----|----|----|----|----|----|----|----|----|----|----|----|----|----|----|----|----|----|----|----|----|----|----|----|----|----|----|----|----|----|----|----|----|----|----|----|----|----|----|----|----|----|----|----|-----|----|----|----|----|----|----|----|----|----|----|----|----|----|----|----|----|----|----|----|----|----|----|----|----|----|----|---|----|----|----|----|----|-----|----|----|----|----|-----|----|-----|----|----|----|----|----|----|----|----|----|----|----|----|----|----|----|----|----|----|----|----|----|----|----|----|----|----|----|----|----|----|----|----|----|----|----|----|----|----|----|----|----|----|----|----|-----|----|----|----|----|----|----|----|----|----|----|----|----|----|----|----|----|----|----|----|----|----|----|----|----|----|----|---|----|----|----|----|----|-----|----|----|----|----|-----|----|-----|----|----|----|----|----|----|----|----|----|----|----|----|----|----|----|----|----|----|----|----|----|----|----|----|----|----|----|----|----|----|----|----|----|----|----|----|----|----|----|----|----|----|----|----|-----|----|----|----|----|----|----|----|----|----|----|----|----|----|----|----|----|----|----|----|----|----|----|----|----|----|----|---|----|----|----|----|----|-----|----|----|----|----|-----|----|-----|----|----|----|----|----|----|----|----|----|----|----|----|----|----|----|----|----|----|----|----|----|----|----|----|----|----|----|----|----|----|----|----|----|----|----|----|----|----|----|----|----|----|----|----|-----|----|----|----|----|----|----|----|----|----|----|----|----|----|----|----|----|----|----|----|----|----|----|----|----|----|----|---|----|----|----|----|----|-----|----|----|----|----|-----|----|-----|----|----|----|----|----|----|----|----|----|----|----|----|----|----|----|----|----|----|----|----|----|----|----|----|----|----|----|----|----|----|----|----|----|----|----|----|----|----|----|----|----|----|----|----|-----|----|----|----|----|----|----|----|----|----|----|----|----|----|----|----|----|----|----|----|----|----|----|----|----|----|----|---|----|----|----|----|----|-----|----|----|----|----|-----|----|-----|----|----|----|----|----|----|----|----|----|----|----|----|----|----|----|----|----|----|----|----|----|----|----|----|----|----|----|----|----|----|----|----|----|----|----|----|----|----|----|----|----|----|----|----|-----|----|----|----|----|----|----|----|----|----|----|----|----|----|----|----|----|----|----|----|----|----|----|----|----|----|----|---|----|----|----|----|----|-----|----|----|----|----|-----|----|-----|----|----|----|----|----|----|----|----|----|----|----|----|----|----|----|----|----|----|----|----|----|----|----|----|----|----|----|----|----|----|----|----|----|----|----|----|----|----|----|----|----|----|----|----|-----|----|----|----|----|----|----|----|----|----|----|----|----|----|----|----|----|----|----|----|----|----|----|----|----|----|----|---|----|----|----|----|----|-----|----|----|----|----|-----|----|-----|----|----|----|----|----|----|----|----|----|----|----|----|----|----|----|----|----|----|----|----|----|----|----|----|----|----|----|----|----|----|----|----|----|----|----|----|----|----|----|----|----|----|----|----|-----|----|----|----|----|----|----|----|----|----|----|----|----|----|----|----|----|----|----|----|----|----|----|----|----|----|----|---|----|----|----|----|----|-----|----|----|----|----|-----|----|-----|----|----|----|----|----|----|----|----|----|----|----|----|----|----|----|----|----|----|----|----|----|----|----|----|----|----|----|----|----|----|----|----|----|----|----|----|----|----|----|----|----|----|----|----|-----|----|----|----|----|----|----|----|----|----|----|----|----|----|----|----|----|----|----|----|----|----|----|----|----|----|----|---|----|----|----|----|----|-----|----|----|----|----|-----|----|-----|----|----|----|----|------|
| SN | XS | YZ | LA | BA | XA | WN | HT | CF | DT | TY | QY | CZ | QH | HR | MD | CS | FS | YS | AS | BD | IT | SZ | CHD | DD | YT | QD | BZ | LY | WT | ZB | JN | JA | ZG | FS | ZS | PD | HS | WH | UN | YJ | ZD | SN | SZ | SL | HS | HZ | HS | SN | SB | N | NC | WH | LA | YS | CS | CHD | TD | NC | QY | CZ | LAZ | GB | CHD | DY | MI | QI | KM | YS | GY | GL | LZ | SN | BH | ZD | HS | ZG | ZY | SH | SN | ST | AM | QY | ZD | SN | WZ | LY | WT | LA | BA | XA | WN | HT | CF | DT | TY | QY | CZ | QH | HR | MD | CS | FS | YS | AS | BD | IT | SZ | CHD | DD | YT | QD | BZ | LY | WT | ZB | JN | JA | ZG | FS | ZS | PD | HS | WH | UN | YJ | ZD | SN | SZ | SL | HS | HZ | HS | SN | SB | N | NC | WH | LA | YS | CS | CHD | TD | NC | QY | CZ | LAZ | GB | CHD | DY | MI | QI | KM | YS | GY | GL | LZ | SN | BH | ZD | HS | ZG | ZY | SH | SN | ST | AM | QY | ZD | SN | WZ | LY | WT | LA | BA | XA | WN | HT | CF | DT | TY | QY | CZ | QH | HR | MD | CS | FS | YS | AS | BD | IT | SZ | CHD | DD | YT | QD | BZ | LY | WT | ZB | JN | JA | ZG | FS | ZS | PD | HS | WH | UN | YJ | ZD | SN | SZ | SL | HS | HZ | HS | SN | SB | N | NC | WH | LA | YS | CS | CHD | TD | NC | QY | CZ | LAZ | GB | CHD | DY | MI | QI | KM | YS | GY | GL | LZ | SN | BH | ZD | HS | ZG | ZY | SH | SN | ST | AM | QY | ZD | SN | WZ | LY | WT | LA | BA | XA | WN | HT | CF | DT | TY | QY | CZ | QH | HR | MD | CS | FS | YS | AS | BD | IT | SZ | CHD | DD | YT | QD | BZ | LY | WT | ZB | JN | JA | ZG | FS | ZS | PD | HS | WH | UN | YJ | ZD | SN | SZ | SL | HS | HZ | HS | SN | SB | N | NC | WH | LA | YS | CS | CHD | TD | NC | QY | CZ | LAZ | GB | CHD | DY | MI | QI | KM | YS | GY | GL | LZ | SN | BH | ZD | HS | ZG | ZY | SH | SN | ST | AM | QY | ZD | SN | WZ | LY | WT | LA | BA | XA | WN | HT | CF | DT | TY | QY | CZ | QH | HR | MD | CS | FS | YS | AS | BD | IT | SZ | CHD | DD | YT | QD | BZ | LY | WT | ZB | JN | JA | ZG | FS | ZS | PD | HS | WH | UN | YJ | ZD | SN | SZ | SL | HS | HZ | HS | SN | SB | N | NC | WH | LA | YS | CS | CHD | TD | NC | QY | CZ | LAZ | GB | CHD | DY | MI | QI | KM | YS | GY | GL | LZ | SN | BH | ZD | HS | ZG | ZY | SH | SN | ST | AM | QY | ZD | SN | WZ | LY | WT | LA | BA | XA | WN | HT | CF | DT | TY | QY | CZ | QH | HR | MD | CS | FS | YS | AS | BD | IT | SZ | CHD | DD | YT | QD | BZ | LY | WT | ZB | JN | JA | ZG | FS | ZS | PD | HS | WH | UN | YJ | ZD | SN | SZ | SL | HS | HZ | HS | SN | SB | N | NC | WH | LA | YS | CS | CHD | TD | NC | QY | CZ | LAZ | GB | CHD | DY | MI | QI | KM | YS | GY | GL | LZ | SN | BH | ZD | HS | ZG | ZY | SH | SN | ST | AM | QY | ZD | SN | WZ | LY | WT | LA | BA | XA | WN | HT | CF | DT | TY | QY | CZ | QH | HR | MD | CS | FS | YS | AS | BD | IT | SZ | CHD | DD | YT | QD | BZ | LY | WT | ZB | JN | JA | ZG | FS | ZS | PD | HS | WH | UN | YJ | ZD | SN | SZ | SL | HS | HZ | HS | SN | SB | N | NC | WH | LA | YS | CS | CHD | TD | NC | QY | CZ | LAZ | GB | CHD | DY | MI | QI | KM | YS | GY | GL | LZ | SN | BH | ZD | HS | ZG | ZY | SH | SN | ST | AM | QY | ZD | SN | WZ | LY | WT | LA | BA | XA | WN | HT | CF | DT | TY | QY | CZ | QH | HR | MD | CS | FS | YS | AS | BD | IT | SZ | CHD | DD | YT | QD | BZ | LY | WT | ZB | JN | JA | ZG | FS | ZS | PD | HS | WH | UN | YJ | ZD | SN | SZ | SL | HS | HZ | HS | SN | SB | N | NC | WH | LA | YS | CS | CHD | TD | NC | QY | CZ | LAZ | GB | CHD | DY | MI | QI | KM | YS | GY | GL | LZ | SN | BH | ZD | HS | ZG | ZY | SH | SN | ST | AM | QY | ZD | SN | WZ | LY | WT | LA | BA | XA | WN | HT | CF | DT | TY | QY | CZ | QH | HR | MD | CS | FS | YS | AS | BD | IT | SZ | CHD | DD | YT | QD | BZ | LY | WT | ZB | JN | JA | ZG | FS | ZS | PD | HS | WH | UN | YJ | ZD | SN | SZ | SL | HS | HZ | HS | SN | SB | N | NC | WH | LA | YS | CS | CHD | TD | NC | QY | CZ | LAZ | GB | CHD | DY | MI | QI | KM | YS | GY | GL | LZ | SN | BH | ZD | HS | ZG | ZY | SH | SN | ST | AM | QY | ZD | SN | WZ | LY | WT | LA | BA | XA | WN | HT | CF | DT | TY | QY | CZ | QH | HR | MD | CS | FS | YS | AS | BD | IT | SZ | CHD | DD | YT | QD | BZ | LY | WT | ZB | JN | JA | ZG | FS | ZS | PD | HS | WH | UN | YJ | ZD | SN | SZ | SL | HS | HZ | HS | SN | SB | N | NC | WH | LA | YS | CS | CHD | TD | NC | QY | CZ | LAZ | GB | CHD | DY | MI | QI | KM | YS | GY | GL | LZ | SN | BH | ZD | HS | ZG | ZY | SH | SN | ST | AM | QY | ZD | SN | WZ | LY | WT | LA | BA | XA | WN | HT | CF | DT | TY | QY | CZ | QH | HR | MD | CS | FS | YS | AS | BD | IT | SZ | CHD | DD | YT | QD | BZ | LY | WT | ZB | JN | JA | ZG | FS | ZS | PD | HS | WH | UN | YJ | ZD | SN | SZ | SL | HS | HZ | HS | SN | SB | N | NC | WH | LA | YS | CS | CHD | TD | NC | QY | CZ | LAZ | GB | CHD | DY | MI | QI | KM | YS | GY | GL | LZ | SN | BH | ZD | HS | ZG | ZY | SH | SN | ST | AM | QY | ZD | SN | WZ | LY | WT | LA | BA | XA | WN | HT | CF | DT | TY | QY | CZ | QH | HR | MD | CS | FS | YS | AS | BD | IT | SZ | CHD | DD | YT | QD | BZ | LY | WT | ZB | JN | JA | ZG | FS | ZS | PD | HS | WH | UN | YJ | ZD | SN | SZ | SL | HS | HZ | HS | SN | SB | N | NC | WH | LA | YS | CS | CHD | TD | NC | QY | CZ | LAZ | GB | CHD | DY | MI | QI | KM | YS | GY | GL | LZ | SN | BH | ZD | HS | ZG | ZY | SH | SN | ST | AM | QY | ZD | SN | WZ | LY | WT | LA | BA | XA | WN | HT | CF | DT | TY | QY | CZ | QH | HR | MD | CS | FS | YS | AS | BD | IT | SZ | CHD | DD | YT | QD | BZ | LY | WT | ZB | JN | JA | ZG | FS | ZS | PD | HS | WH | UN | YJ | ZD | SN | SZ | SL | HS | HZ | HS | SN | SB | N | NC | WH | LA | YS | CS | CHD | TD | NC | QY | CZ | LAZ | GB | CHD | DY | MI | QI | KM | YS | GY | GL | LZ | SN | BH | ZD | HS | ZG | ZY | SH | SN | ST | AM | QY | ZD | SN | WZ | LY | WT | LA | BA | XA | WN | HT | CF | DT | TY | QY | CZ | QH | HR | MD | CS | FS | YS | AS | BD | IT | SZ | CHD | DD | YT | QD | BZ | LY | WT | ZB | JN | JA | ZG | FS | ZS | PD | HS | WH | UN | YJ | ZD | SN | SZ | SL | HS | HZ | HS | SN | SB | N | NC | WH | LA | YS | CS | CHD | TD | NC | QY | CZ | LAZ | GB | CHD | DY | MI | QI | KM | YS | GY | GL | LZ | SN | BH | ZD | HS | ZG | ZY | SH | SN | ST | AM | QY | ZD | SN | WZ | LY | WT | LA | BA | XA | WN | HT | CF | DT | TY | QY | CZ | QH | HR | MD | CS | FS | YS | AS | BD | IT | SZ | CHD | DD | YT | QD | BZ | LY | WT | ZB | JN | JA | ZG | FS | ZS | PD | HS | WH | UN | YJ | ZD | SN | SZ | SL | HS | HZ | HS | SN | SB | N | NC | WH | LA | YS | CS | CHD | TD | NC | QY | CZ | LAZ | GB | CHD | DY | MI | QI | KM | YS | GY | GL | LZ | SN | BH | ZD | HS | ZG | ZY | SH | SN | ST | AM | QY | ZD | SN | WZ | LY | WT | LA | BA | XA | WN | HT | CF | DT | TY | QY | CZ | QH | HR | MD | CS | FS | YS | AS | BD | IT | SZ | CHD | DD | YT | QD | BZ | LY | WT | ZB | JN | JA | ZG | FS | ZS | PD | HS | WH | UN | YJ | ZD | SN | SZ | SL | HS | HZ | HS | SN | SB | N | NC | WH | LA | YS | CS | CHD | TD | NC | QY | CZ | LAZ | GB | CHD | DY | MI | QI | KM | YS | GY | GL | LZ | SN | BH | ZD | HS | ZG | ZY | SH | SN | ST | AM | QY | ZD | SN | WZ | LY | WT | LA | BA | XA | WN | HT | CF | DT | TY | QY | CZ | QH | HR | MD | CS | FS | YS | AS | BD | IT | SZ | CHD | DD | YT | QD | BZ | LY | WT | ZB | JN | JA | ZG | FS | ZS | PD | HS | WH | UN | YJ | ZD | SN | SZ | SL | HS | HZ | HS | SN | SB | N | NC | WH | LA | YS | CS | CHD | TD | NC | QY | CZ | LAZ | GB | CHD | DY | MI | QI | KM | YS | GY | GL | LZ | SN | BH | ZD | HS | ZG | ZY | SH | SN | ST | AM | QY | ZD | SN | WZ | LY | WT | LA | BA | XA | WN | HT | CF | DT | TY | QY | CZ | QH | HR | MD | CS | FS | YS | AS | BD | IT | SZ | CHD | DD | YT | QD | BZ | LY | WT | ZB | JN | JA | ZG | FS | ZS | PD | HS | WH | UN | YJ | ZD | SN | SZ | SL | HS | HZ | HS | SN | SB | N | NC | WH | LA | YS | CS | CHD | TD | NC | QY | CZ | LAZ | GB | CHD | DY | MI | QI | KM | YS | GY | GL | LZ | SN | BH | ZD | HS | ZG | ZY | SH | SN | ST | AM | QY | ZD | SN | WZ | LY | WT | LA | BA | XA | WN | HT | CF | DT | TY | QY | CZ | QH | HR | MD | CS | FS | YS | AS | BD | IT | SZ | CHD | DD | YT | QD | BZ | LY | WT | ZB | JN | JA | ZG | FS | ZS | PD | HS | WH | UN | YJ | ZD | SN | SZ | SL | HS | HZ | HS | SN | SB | N | NC | WH | LA | YS | CS | CHD | TD | NC | QY | CZ | LAZ | GB | CHD | DY | MI | QI | KM | YS | GY | GL | LZ | SN | BH | ZD | HS | ZG | ZY | SH | SN | ST | AM | QY | ZD | SN | WZ | LY | WT | LA | BA | XA | WN | HT | CF | DT | TY | QY | CZ | QH | HR | MD | CS | FS | YS | AS | BD | IT | SZ | CHD | DD | YT | QD | BZ | LY | WT | ZB | JN | JA | ZG | FS | ZS | PD | HS | WH | UN | YJ | ZD | SN | SZ | SL | HS | HZ | HS | SN | SB | N | NC | WH | LA | YS | CS | CHD | TD | NC | QY | CZ | LAZ | GB | CHD | DY | MI | QI | KM | YS | GY | GL | LZ | SN | BH | ZD | HS | ZG | ZY | SH | SN | ST | AM | QY | ZD | SN | WZ | LY | WT | LA | BA | XA | WN | HT | CF | DT | TY | QY | CZ | QH | HR | MD | CS | FS | YS | AS | BD | IT | SZ | CHD | DD | YT | QD | BZ | LY | WT | ZB | JN | JA | ZG | FS | ZS | PD | HS | WH | UN | YJ | ZD | SN | SZ | SL | HS | HZ | HS | SN | SB | N | NC | WH | LA | YS | CS | CHD | TD | NC | QY | CZ | LAZ | GB | CHD | DY | MI | QI | KM | YS | GY | GL | LZ | SN | BH | ZD | HS | ZG | ZY | SH | SN | ST | AM | QY | ZD | SN | WZ | LY | WT | LA | BA | XA | WN | HT | CF | DT | TY | QY | CZ | QH | HR | MD | CS | FS | YS | AS | BD | IT | SZ | CHD | DD | YT | QD | BZ | LY | WT | ZB | JN | JA | ZG | FS | ZS | PD | HS | WH | UN | YJ | ZD | SN | SZ | SL | HS | HZ | HS | SN | SB | N | NC | WH | LA | YS | CS | CHD | TD | NC | QY | CZ | LAZ | GB | CHD | DY | MI | QI | KM | YS | GY | GL | LZ | SN | BH | ZD | HS | ZG | ZY | SH | SN | ST | AM | QY | ZD | SN | WZ | LY | WT | LA | BA | XA | WN | HT | CF | DT | TY | QY | CZ | QH | HR | MD | CS | FS | YS | AS | BD | IT | SZ | CHD | DD | YT | QD | BZ | LY | WT | ZB | JN | JA | ZG | FS | ZS | PD | HS | WH | UN | YJ | ZD | SN | SZ | SL | HS | HZ | HS | SN | SB | N | NC | WH | LA | YS | CS | CHD | TD | NC | QY | CZ | LAZ | GB | CHD | DY | MI | QI | KM | YS | GY | GL | LZ | SN | BH | ZD | HS | ZG | ZY | SH | SN | ST | AM | QY | ZD | SN | WZ | LY | WT | LA | BA | XA | WN | HT | CF | DT | TY | QY | CZ | QH | HR | MD | CS | FS | YS | AS | BD | IT | SZ | CHD | DD | YT | QD | BZ | LY | WT | ZB | JN | JA | ZG | FS | ZS | PD | HS | WH | UN | YJ | ZD | SN | SZ | SL | HS | HZ | HS | SN | SB | N | NC | WH | LA | YS | CS | CHD | TD | NC | QY | CZ | LAZ | GB | CHD | DY | MI | QI | KM | YS</ |
|----|----|----|----|----|----|----|----|----|----|----|----|----|----|----|----|----|----|----|----|----|----|----|-----|----|----|----|----|----|----|----|----|----|----|----|----|----|----|----|----|----|----|----|----|----|----|----|----|----|----|---|----|----|----|----|----|-----|----|----|----|----|-----|----|-----|----|----|----|----|----|----|----|----|----|----|----|----|----|----|----|----|----|----|----|----|----|----|----|----|----|----|----|----|----|----|----|----|----|----|----|----|----|----|----|----|----|----|----|----|-----|----|----|----|----|----|----|----|----|----|----|----|----|----|----|----|----|----|----|----|----|----|----|----|----|----|----|---|----|----|----|----|----|-----|----|----|----|----|-----|----|-----|----|----|----|----|----|----|----|----|----|----|----|----|----|----|----|----|----|----|----|----|----|----|----|----|----|----|----|----|----|----|----|----|----|----|----|----|----|----|----|----|----|----|----|----|-----|----|----|----|----|----|----|----|----|----|----|----|----|----|----|----|----|----|----|----|----|----|----|----|----|----|----|---|----|----|----|----|----|-----|----|----|----|----|-----|----|-----|----|----|----|----|----|----|----|----|----|----|----|----|----|----|----|----|----|----|----|----|----|----|----|----|----|----|----|----|----|----|----|----|----|----|----|----|----|----|----|----|----|----|----|----|-----|----|----|----|----|----|----|----|----|----|----|----|----|----|----|----|----|----|----|----|----|----|----|----|----|----|----|---|----|----|----|----|----|-----|----|----|----|----|-----|----|-----|----|----|----|----|----|----|----|----|----|----|----|----|----|----|----|----|----|----|----|----|----|----|----|----|----|----|----|----|----|----|----|----|----|----|----|----|----|----|----|----|----|----|----|----|-----|----|----|----|----|----|----|----|----|----|----|----|----|----|----|----|----|----|----|----|----|----|----|----|----|----|----|---|----|----|----|----|----|-----|----|----|----|----|-----|----|-----|----|----|----|----|----|----|----|----|----|----|----|----|----|----|----|----|----|----|----|----|----|----|----|----|----|----|----|----|----|----|----|----|----|----|----|----|----|----|----|----|----|----|----|----|-----|----|----|----|----|----|----|----|----|----|----|----|----|----|----|----|----|----|----|----|----|----|----|----|----|----|----|---|----|----|----|----|----|-----|----|----|----|----|-----|----|-----|----|----|----|----|----|----|----|----|----|----|----|----|----|----|----|----|----|----|----|----|----|----|----|----|----|----|----|----|----|----|----|----|----|----|----|----|----|----|----|----|----|----|----|----|-----|----|----|----|----|----|----|----|----|----|----|----|----|----|----|----|----|----|----|----|----|----|----|----|----|----|----|---|----|----|----|----|----|-----|----|----|----|----|-----|----|-----|----|----|----|----|----|----|----|----|----|----|----|----|----|----|----|----|----|----|----|----|----|----|----|----|----|----|----|----|----|----|----|----|----|----|----|----|----|----|----|----|----|----|----|----|-----|----|----|----|----|----|----|----|----|----|----|----|----|----|----|----|----|----|----|----|----|----|----|----|----|----|----|---|----|----|----|----|----|-----|----|----|----|----|-----|----|-----|----|----|----|----|----|----|----|----|----|----|----|----|----|----|----|----|----|----|----|----|----|----|----|----|----|----|----|----|----|----|----|----|----|----|----|----|----|----|----|----|----|----|----|----|-----|----|----|----|----|----|----|----|----|----|----|----|----|----|----|----|----|----|----|----|----|----|----|----|----|----|----|---|----|----|----|----|----|-----|----|----|----|----|-----|----|-----|----|----|----|----|----|----|----|----|----|----|----|----|----|----|----|----|----|----|----|----|----|----|----|----|----|----|----|----|----|----|----|----|----|----|----|----|----|----|----|----|----|----|----|----|-----|----|----|----|----|----|----|----|----|----|----|----|----|----|----|----|----|----|----|----|----|----|----|----|----|----|----|---|----|----|----|----|----|-----|----|----|----|----|-----|----|-----|----|----|----|----|----|----|----|----|----|----|----|----|----|----|----|----|----|----|----|----|----|----|----|----|----|----|----|----|----|----|----|----|----|----|----|----|----|----|----|----|----|----|----|----|-----|----|----|----|----|----|----|----|----|----|----|----|----|----|----|----|----|----|----|----|----|----|----|----|----|----|----|---|----|----|----|----|----|-----|----|----|----|----|-----|----|-----|----|----|----|----|----|----|----|----|----|----|----|----|----|----|----|----|----|----|----|----|----|----|----|----|----|----|----|----|----|----|----|----|----|----|----|----|----|----|----|----|----|----|----|----|-----|----|----|----|----|----|----|----|----|----|----|----|----|----|----|----|----|----|----|----|----|----|----|----|----|----|----|---|----|----|----|----|----|-----|----|----|----|----|-----|----|-----|----|----|----|----|----|----|----|----|----|----|----|----|----|----|----|----|----|----|----|----|----|----|----|----|----|----|----|----|----|----|----|----|----|----|----|----|----|----|----|----|----|----|----|----|-----|----|----|----|----|----|----|----|----|----|----|----|----|----|----|----|----|----|----|----|----|----|----|----|----|----|----|---|----|----|----|----|----|-----|----|----|----|----|-----|----|-----|----|----|----|----|----|----|----|----|----|----|----|----|----|----|----|----|----|----|----|----|----|----|----|----|----|----|----|----|----|----|----|----|----|----|----|----|----|----|----|----|----|----|----|----|-----|----|----|----|----|----|----|----|----|----|----|----|----|----|----|----|----|----|----|----|----|----|----|----|----|----|----|---|----|----|----|----|----|-----|----|----|----|----|-----|----|-----|----|----|----|----|----|----|----|----|----|----|----|----|----|----|----|----|----|----|----|----|----|----|----|----|----|----|----|----|----|----|----|----|----|----|----|----|----|----|----|----|----|----|----|----|-----|----|----|----|----|----|----|----|----|----|----|----|----|----|----|----|----|----|----|----|----|----|----|----|----|----|----|---|----|----|----|----|----|-----|----|----|----|----|-----|----|-----|----|----|----|----|----|----|----|----|----|----|----|----|----|----|----|----|----|----|----|----|----|----|----|----|----|----|----|----|----|----|----|----|----|----|----|----|----|----|----|----|----|----|----|----|-----|----|----|----|----|----|----|----|----|----|----|----|----|----|----|----|----|----|----|----|----|----|----|----|----|----|----|---|----|----|----|----|----|-----|----|----|----|----|-----|----|-----|----|----|----|----|----|----|----|----|----|----|----|----|----|----|----|----|----|----|----|----|----|----|----|----|----|----|----|----|----|----|----|----|----|----|----|----|----|----|----|----|----|----|----|----|-----|----|----|----|----|----|----|----|----|----|----|----|----|----|----|----|----|----|----|----|----|----|----|----|----|----|----|---|----|----|----|----|----|-----|----|----|----|----|-----|----|-----|----|----|----|----|----|----|----|----|----|----|----|----|----|----|----|----|----|----|----|----|----|----|----|----|----|----|----|----|----|----|----|----|----|----|----|----|----|----|----|----|----|----|----|----|-----|----|----|----|----|----|----|----|----|----|----|----|----|----|----|----|----|----|----|----|----|----|----|----|----|----|----|---|----|----|----|----|----|-----|----|----|----|----|-----|----|-----|----|----|----|----|----|----|----|----|----|----|----|----|----|----|----|----|----|----|----|----|----|----|----|----|----|----|----|----|----|----|----|----|----|----|----|----|----|----|----|----|----|----|----|----|-----|----|----|----|----|----|----|----|----|----|----|----|----|----|----|----|----|----|----|----|----|----|----|----|----|----|----|---|----|----|----|----|----|-----|----|----|----|----|-----|----|-----|----|----|----|----|----|----|----|----|----|----|----|----|----|----|----|----|----|----|----|----|----|----|----|----|----|----|----|----|----|----|----|----|----|----|----|----|----|----|----|----|----|----|----|----|-----|----|----|----|----|----|----|----|----|----|----|----|----|----|----|----|----|----|----|----|----|----|----|----|----|----|----|---|----|----|----|----|----|-----|----|----|----|----|-----|----|-----|----|----|----|----|----|----|----|----|----|----|----|----|----|----|----|----|----|----|----|----|----|----|----|----|----|----|----|----|----|----|----|----|----|----|----|----|----|----|----|----|----|----|----|----|-----|----|----|----|----|----|----|----|----|----|----|----|----|----|----|----|----|----|----|----|----|----|----|----|----|----|----|---|----|----|----|----|----|-----|----|----|----|----|-----|----|-----|----|----|----|----|----|----|----|----|----|----|----|----|----|----|----|----|----|----|----|----|----|----|----|----|----|----|----|----|----|----|----|----|----|----|----|----|----|----|----|----|----|----|----|----|-----|----|----|----|----|----|----|----|----|----|----|----|----|----|----|----|----|----|----|----|----|----|----|----|----|----|----|---|----|----|----|----|----|-----|----|----|----|----|-----|----|-----|----|----|----|----|----|----|----|----|----|----|----|----|----|----|----|----|----|----|----|----|----|----|----|----|----|----|----|----|----|----|----|----|----|----|----|----|----|----|----|----|----|----|----|----|-----|----|----|----|----|----|----|----|----|----|----|----|----|----|----|----|----|----|----|----|----|----|----|----|----|----|----|---|----|----|----|----|----|-----|----|----|----|----|-----|----|-----|----|----|----|----|----|----|----|----|----|----|----|----|----|----|----|----|----|----|----|----|----|----|----|----|----|----|----|----|----|----|----|----|----|----|----|----|----|----|----|----|----|----|----|----|-----|----|----|----|----|----|----|----|----|----|----|----|----|----|----|----|----|----|----|----|----|----|----|----|----|----|----|---|----|----|----|----|----|-----|----|----|----|----|-----|----|-----|----|----|----|----|------|

The upper right portion of this table shows the number of daily API pairs used in the calculations. The lower left portion of the table shows the correlation coefficients. Only correlations (t-values) significant at  $p < 0.01$  are listed; those in bold type are correlations between APIs of the cities attributed to one specific cluster (which were also used as reference to cluster) and dashes are significant  $p < 0.05$  or not significant.

G-1 through to G-14 on the upper-left to lower-right diagonal labelled the specific group of the cities, with correlation coefficients between them framed

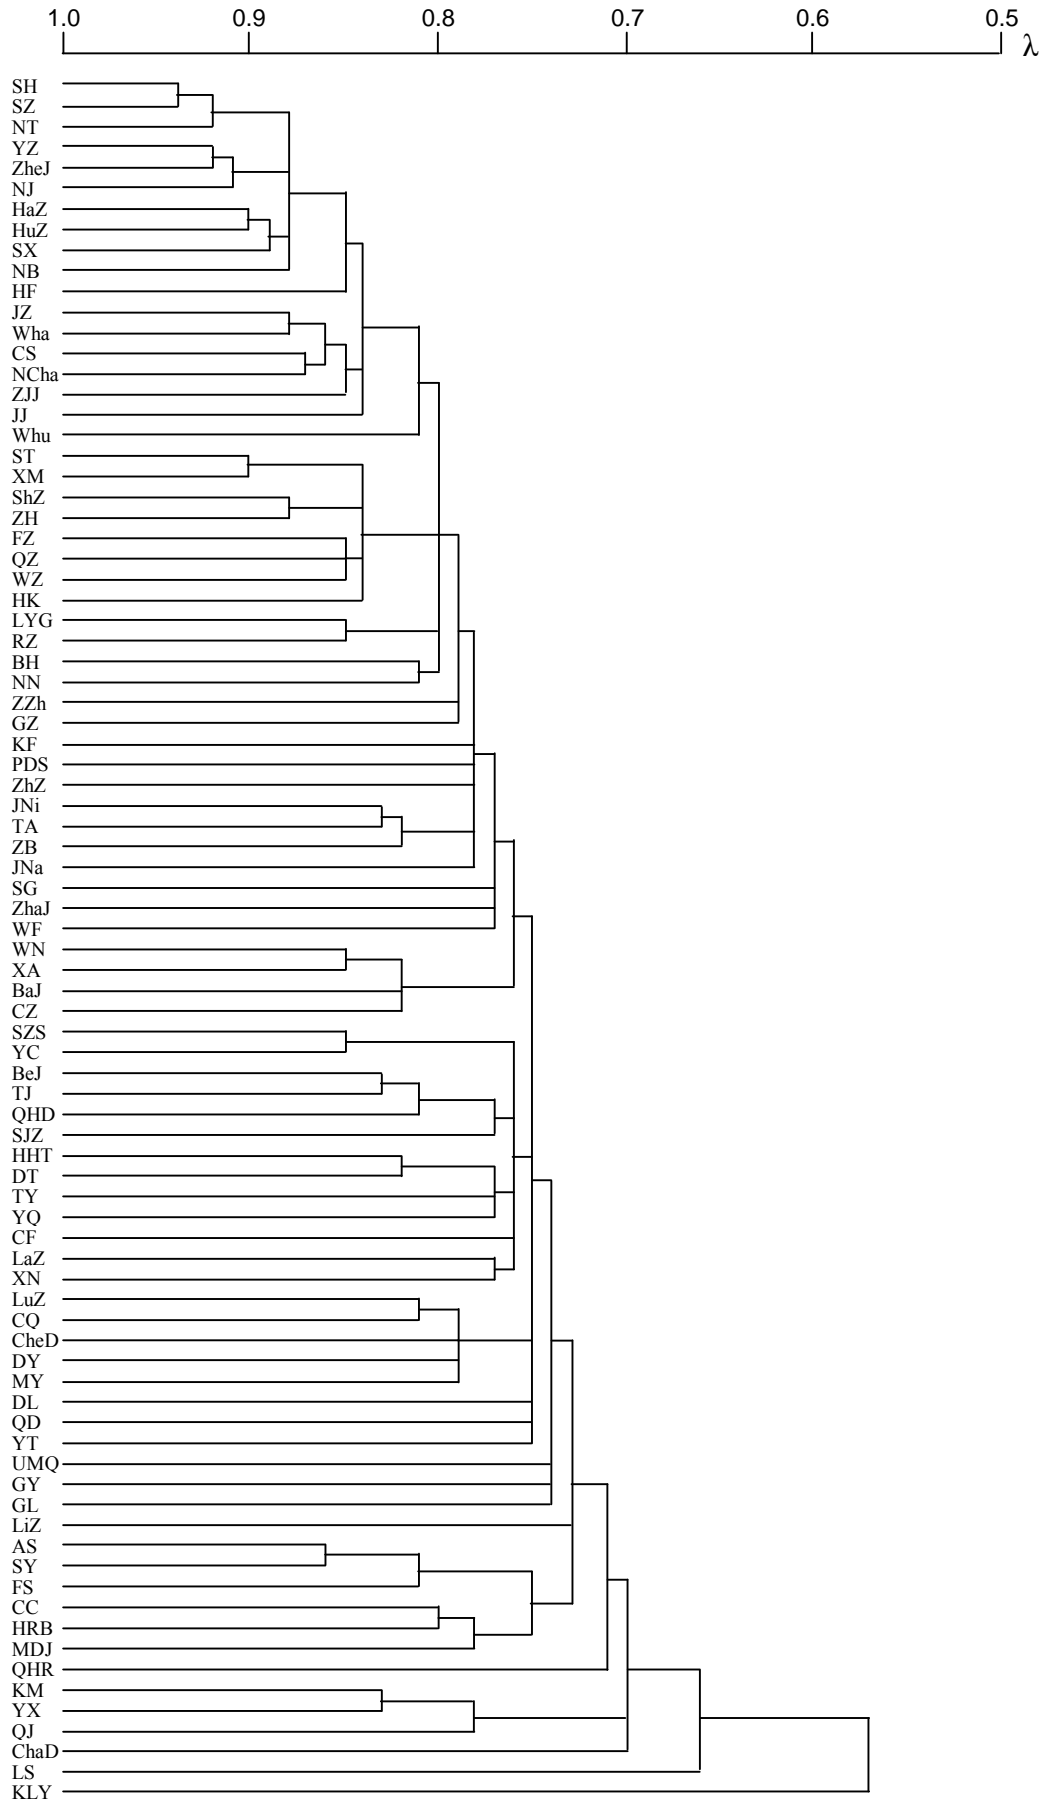

**Fig. S1.** The dendrogram of fuzzy clustering of the cities according to the daily Air Pollution Indexes (APIs) from June 2000 to February 2007. Full name of the cities are listed in Table 1. The method for clustering of the cities is: (1) calculate the correlation coefficient matrix  $R_0(r'_{ij})$ , and transform the

correlation coefficient matrix  $R_0(r'_{ij})$  to the fuzzy relation matrix  $R(r_{ij})$ ; the formula for this transform is  $r_{ij} = 0.5 + \frac{1}{2}r'_{ij}$ , and  $r'_{ij}$  is correlation coefficient between the APIs of the cities; (2) constantly square the fuzzy relation matrix  $R(r_{ij})$  by using the transitive closure algorithms until the result remains unchangeable, get the classify fuzzy matrix  $RR$ ; (3) get the cut classify fuzzy matrix  $RR_\lambda$  by using different  $\lambda$  value, step-wise clustering of the cities according to the cut classify fuzzy matrices  $RR_\lambda$  at different  $\lambda$  levels.
